# Supplementary material for: Revealing the ecological content of long-duration audio-recordings of the environment through clustering and visualisation
Source: PubMed Central journal article supplement (PMC5832236; doi:10.1371/journal.pone.0193345), 2018-03-01
Supplement: pone.0193345.s001.pdf [file pone.0193345.s001.pdf]

# S1 Site Information

The following pages contain two sections:

Section A: Site photographs of the two sites (photographs taken by Y. Phillips).

Section B: Species List – listing of bird species which have been annotated in the recordings at each site.

## Section A: Site details

**Contents:** Site details includes photographs of the site.

### Notes:

1. Gympie is 160 km north of Brisbane in Queensland, Australia.
2. Gympie National Park (gazetted in 2006) previously a State Forest and Forest Reserve has an area of 1768 hectare [1]. The recording site within the National Park has an elevation of 225 m and a distance of 45 km from the coastline.
3. Woondum National Park (gazetted in 2009) approximately 20 km south-east of Gympie was previously a State Forest and Forest Reserve has an area of 4001 hectares [2]. The recording site has an elevation of 118 m and is 28 km from the coastline.



|                                                                                                                                                                                        |                                                                                                                                                                                     |
|----------------------------------------------------------------------------------------------------------------------------------------------------------------------------------------|-------------------------------------------------------------------------------------------------------------------------------------------------------------------------------------|
|  A green rectangular SM2+ recorder is mounted on a tree trunk in a forest setting.                     |  A view of a forest with tall, thin trees and a fallen log on the ground.                         |
| <p>SM2+ recorder in situ</p>                                                                                                                                                           | <p>Vegetation structure</p>                                                                                                                                                         |
|  A view of a tree canopy with mistletoe species visible on the branches.                              |  A close-up view of a mistletoe species with yellow and orange flowers.                          |
| <p>Tree Canopy with Mistletoe spp.</p>                                                                                                                                                 | <p>Mistletoe species</p>                                                                                                                                                            |
|  A view of the ground cover, showing a path with fallen leaves and a person's feet in blue sneakers. |  A view of a dirt path leading through a forest, indicating vehicle access.                     |
| <p>Groundcover</p>                                                                                                                                                                     | <p>Vehicle access</p>                                                                                                                                                               |
|  A close-up view of a large, flat, light-colored rock fragment, likely sedimentary (metamorphosed).  |  A view of a grey shrike-thrush captured on a wildlife camera, perched on a branch in a forest. |
| <p>Geology – Sedimentary (metamorphosed)</p>                                                                                                                                           | <p>Grey shrike-thrush captured on a wildlife camera</p>                                                                                                                             |



|                                                                                                                                                                                            |                                                                                                                                                                                             |
|--------------------------------------------------------------------------------------------------------------------------------------------------------------------------------------------|---------------------------------------------------------------------------------------------------------------------------------------------------------------------------------------------|
|  A teal-colored SM2+ recorder is mounted on a tree trunk in a forest setting.                              |  A photograph showing the vertical structure of a forest with many thin tree trunks and some undergrowth. |
| <p>SM2+ recorder in situ</p>                                                                                                                                                               | <p>Vegetation structure</p>                                                                                                                                                                 |
|  A low-angle shot looking up into the dense canopy of tall trees.                                         |  A close-up of a native ginger plant with long green leaves and a cluster of small blue flowers.         |
| <p>Tree canopy</p>                                                                                                                                                                         | <p>Native ginger (<i>Alpinia caerulea</i>)</p>                                                                                                                                              |
|  A view of the forest floor covered in brown, fallen leaves, with a pair of boots visible at the bottom. |  A dirt path with tire tracks winding through a forest, indicating that vehicle access is not allowed.  |
| <p>Groundcover</p>                                                                                                                                                                         | <p>No vehicle access is permitted.</p>                                                                                                                                                      |
|  A large, moss-covered granite rock on the forest floor with some plants growing on it.                  |  A photograph of an Eastern Whipbird perched on a branch in a forest.                                   |
| <p>Geology – Granite</p>                                                                                                                                                                   | <p>Eastern Whipbird captured on a wildlife camera</p>                                                                                                                                       |



## Section B: Bird Species

Bird species at Gympie and Woondum National Park sites by Order and Family

| Order            | Family [3]    | Species Names (Gympie NP)                                                                                                                | N | Species Names (Woondum NP)                                                                                                  | N | Number in common | TOTAL |
|------------------|---------------|------------------------------------------------------------------------------------------------------------------------------------------|---|-----------------------------------------------------------------------------------------------------------------------------|---|------------------|-------|
| Caprimulgiformes | Aegothelidae  | Australian Owlet-Nightjar                                                                                                                | 1 | Australian Owlet-Nightjar                                                                                                   | 1 | 1                | 1     |
| Caprimulgiformes | Caprimulgidae | White-throated Nightjar                                                                                                                  | 1 |                                                                                                                             | 0 | 0                | 1     |
| Caprimulgiformes | Podargidae    | Tawny Frogmouth                                                                                                                          | 1 |                                                                                                                             | 0 | 0                | 1     |
| Columbiformes    | Columbidae    | Brown Cuckoo-Dove<br>Peaceful Dove<br>Wonga Pigeon<br>Topknot Pigeon ☉<br>Bar-shouldered Dove ☉<br>Emerald Dove ☉<br>White-headed Pigeon | 7 | Brown Cuckoo-Dove<br>Peaceful Dove<br>Wonga Pigeon<br>Woompoo Fruit Dove<br>White-headed Pigeon<br>Superb Fruit-Dove        | 6 | 4                | 9     |
| Coraciiformes    | Halcyonidae   | Laughing Kookaburra                                                                                                                      | 1 | Laughing Kookaburra                                                                                                         | 1 | 1                | 1     |
| Coraciiformes    | Meropidae     | Rainbow Bee-eater                                                                                                                        | 1 | Rainbow Bee-eater                                                                                                           | 1 | 1                | 1     |
| Cuculiformes     | Cuculidae     | Fan-tailed Cuckoo<br>Brush Cuckoo<br>Shining Bronze Cuckoo<br>Channel-billed Cuckoo                                                      | 4 | Fan-tailed Cuckoo<br>Brush Cuckoo<br>Shining Bronze Cuckoo<br>Channel-billed Cuckoo<br>Eastern Koel<br>Little Bronze-Cuckoo | 6 | 4                | 6     |
| Galliformes      | Megapodiidae  | Australian Brush Turkey                                                                                                                  | 1 | Australian Brush Turkey                                                                                                     | 1 | 1                | 1     |
| Passeriformes    | Acanthizidae  | White-browed Scrubwren<br>Large-billed Scrubwren<br>Brown Gerygone<br>White-throated Gerygone                                            | 4 | Large-billed Scrubwren<br>Brown Gerygone<br>Brown Thornbill                                                                 | 3 | 3                | 4     |
| Passeriformes    | Artamidae     | Pied Butcherbird<br>Grey Butcherbird<br>Pied Currawong<br>Australian Magpie                                                              | 4 | Pied Currawong<br>Australian Magpie                                                                                         | 2 | 2                | 4     |

| Order         | Family [3]      | Species Names (Gympie NP)                                                                                                                               | N | Species Names (Woondum NP)                                                                                          | N | Number in common | TOTAL |
|---------------|-----------------|---------------------------------------------------------------------------------------------------------------------------------------------------------|---|---------------------------------------------------------------------------------------------------------------------|---|------------------|-------|
| Passeriformes | Campephagidae   | Black-faced Cuckoo-shrike<br>White-bellied Cuckoo-shrike<br>Cicadabird<br>Varied Triller                                                                | 4 | Cicadabird<br>Varied Triller                                                                                        | 2 | 2                | 4     |
| Passeriformes | Cinclosomatidae | Eastern Whipbird                                                                                                                                        | 1 | Eastern Whipbird                                                                                                    | 1 | 1                | 1     |
| Passeriformes | Climacteridae   | White-throated Treecreeper                                                                                                                              | 1 | White-throated Treecreeper<br>Red-browed Treecreeper                                                                | 2 | 1                | 2     |
| Passeriformes | Corcoracidae    | White-winged Chough                                                                                                                                     | 1 |                                                                                                                     | 0 | 0                | 1     |
| Passeriformes | Corvidae        | Torresian Crow                                                                                                                                          | 1 | Torresian Crow                                                                                                      | 1 | 1                | 1     |
| Passeriformes | Dicaeidae       | Mistletoebird                                                                                                                                           | 1 | Mistletoebird                                                                                                       | 1 | 1                | 1     |
| Passeriformes | Dicruridae      | Spangled Drongo<br>Spectacled Monarch<br>Black-faced Monarch<br>Leaden Flycatcher<br>Magpie-Lark<br>Grey Fantail<br>Rufous Fantail<br>Willie-wagtail    | 8 | Spangled Drongo<br>Spectacled Monarch<br>Leaden Flycatcher<br>Grey Fantail<br>Rufous Fantail                        | 5 | 5                | 8     |
| Passeriformes | Estrildidae     |                                                                                                                                                         | 0 | Red-browed Finch                                                                                                    | 1 | 0                | 1     |
| Passeriformes | Maluridae       | Variegated Fairy-wren                                                                                                                                   | 1 | Variegated Fairy-wren                                                                                               | 1 | 1                | 1     |
| Passeriformes | Meliphagidae    | Scarlet Honeyeater<br>White-throated Honeyeater<br>Lewin's Honeyeater<br>Noisy Miner<br>Eastern Spinebill<br>Noisy Friarbird<br>Yellow-faced Honeyeater | 7 | Scarlet Honeyeater<br>White-throated Honeyeater<br>Lewin's Honeyeater<br>Yellow-faced Honeyeater<br>Noisy Friarbird | 5 | 5                | 7     |
| Passeriformes | Oriolidae       |                                                                                                                                                         | 0 | Olive-backed Oriole<br>Australian Figbird                                                                           | 2 | 0                | 2     |
| Passeriformes | Orthonychidae   |                                                                                                                                                         | 0 | Australian Logrunner                                                                                                | 1 | 0                | 1     |

| Order          | Family [3]        | Species Names (Gympie NP)                                                                                       | N         | Species Names (Woondum NP)                                                       | N         | Number in common | TOTAL     |
|----------------|-------------------|-----------------------------------------------------------------------------------------------------------------|-----------|----------------------------------------------------------------------------------|-----------|------------------|-----------|
| Passeriformes  | Pachycephalidae   | Rufous Whistler<br>Golden Whistler<br>Grey Shrike-thrush<br>Eastern Shrike-tit                                  | 4         | Rufous Whistler<br>Golden Whistler<br>Grey Shrike-thrush<br>Little Shrike-thrush | 4         | 3                | 5         |
| Passeriformes  | Pardalotidae      | Spotted Pardalote<br>Striated Pardalote                                                                         | 2         |                                                                                  | 0         | 0                | 2         |
| Passeriformes  | Petroicidae       | Eastern Yellow Robin<br>Rose Robin                                                                              | 2         | Eastern Yellow Robin                                                             | 1         | 1                | 2         |
| Passeriformes  | Pittidae          | Noisy Pitta                                                                                                     | 1         | Noisy Pitta                                                                      | 1         | 1                | 1         |
| Passeriformes  | Ptilonorhynchidae | -                                                                                                               | 0         | Green Catbird                                                                    | 1         | 0                | 1         |
| Passeriformes  | Zosteropidae      |                                                                                                                 | 0         | Silvereye                                                                        | 1         |                  | 1         |
| Psittaciformes | Psittacidae       | Scaly-breasted Lorikeet<br>Rainbow Lorikeet<br>Little Lorikeet<br>Australian King Parrot<br>Pale-headed Rosella | 5         | Rainbow Lorikeet<br>Little Lorikeet<br>Australian King Parrot<br>Crimson Rosella | 4         | 4                | 5         |
| Strigiformes   | Strigidae         | Southern Boobook<br>Powerful Owl                                                                                | 2         | Southern Boobook                                                                 | 1         | 1                | 2         |
| Strigiformes   | Tytonidae         | -                                                                                                               | 0         | Sooty Owl                                                                        | 1         | 0                | 1         |
| <b>TOTALS</b>  | <b>30</b>         | <b>GYMPIE NP TOTAL</b>                                                                                          | <b>66</b> | <b>WOONDUM NP TOTAL</b>                                                          | <b>57</b> | <b>44</b>        | <b>79</b> |

☉ Birds seen at site but not yet found (annotated) in the recording

## References

1. Queensland Government. Gympie National Park Management Statement 2013; (30 December 2012). Available from: <http://www.npsr.qld.gov.au/managing/plans-strategies/statements/pdf/gympie.pdf>.
2. Queensland Government. Woondum National Park Management Statement 2013. Available from: <http://www.npsr.qld.gov.au/managing/plans-strategies/statements/pdf/woondum.pdf>.
3. Simpson K, Day N. Field Guide to the Birds of Australia. Camberwell, Australia: Penguin Group; 2004.
