# Supplementary material for: Revealing the ecological content of long-duration audio-recordings of the environment through clustering and visualisation
Source: PubMed Central journal article supplement (PMC5832236; doi:10.1371/journal.pone.0193345), 2018-03-01
Supplement: pone.0193345.s005.pdf [file pone.0193345.s005.pdf]

## S3 Cluster Statistics

The following pages contain five sections:

Section A: Temporal distribution plots –showing the average number of minutes per two hour period per month for all sixty clusters

Section B: Polar Histograms for Gympie and Woondum National Park sites.

Section C: Radar Plots – radar plots showing the medoid of each cluster for each of the sixty clusters.

Section D: Boxplots – The boxplot statistics of each of the twelve summary acoustic indices for a select number of clusters in each acoustic class.

### Section A: Two hour plots

The clusters are grouped in the acoustic classes: Birds, Insects, Cicadas, Planes, Wind, Rain and Quiet. Refer to article for information on each of these classes. These plots are scaled to the maximum of the average number of minutes in that cluster across the two sites. Some averages are large in relation to the 120 minute period, for example cluster 13 in the Quiet acoustic class has an average of 70 minutes. Some clusters are very small and have very low averages, for example clusters 6, 23, 24, 49, 50, 56 and 58. Both of the plane clusters are in this category. Clusters such as clusters 7 and 8 are mixtures of classes, in this case Cicadas, Birds and Wind. Clusters 7 and 8 were classified into the Cicada class because this is the most dominant sound in the minutes sampled, see S2 Sample minutes. The number of minutes in each cluster in each two hour period is averaged over the number of days recorded in each month. The recording started on the 22<sup>nd</sup> June 2015 and ended on the 23<sup>rd</sup> July 2016, as a consequence these months were averaged over nine and twenty-three days respectively.

# BIRD CLUSTERS (#3, 11, 14, 15, 28, 33, 37, 39)

Gympie NP 22 June 2015 to 23 July 2016

Woondum NP 22 June 2015 to 23 July 2016

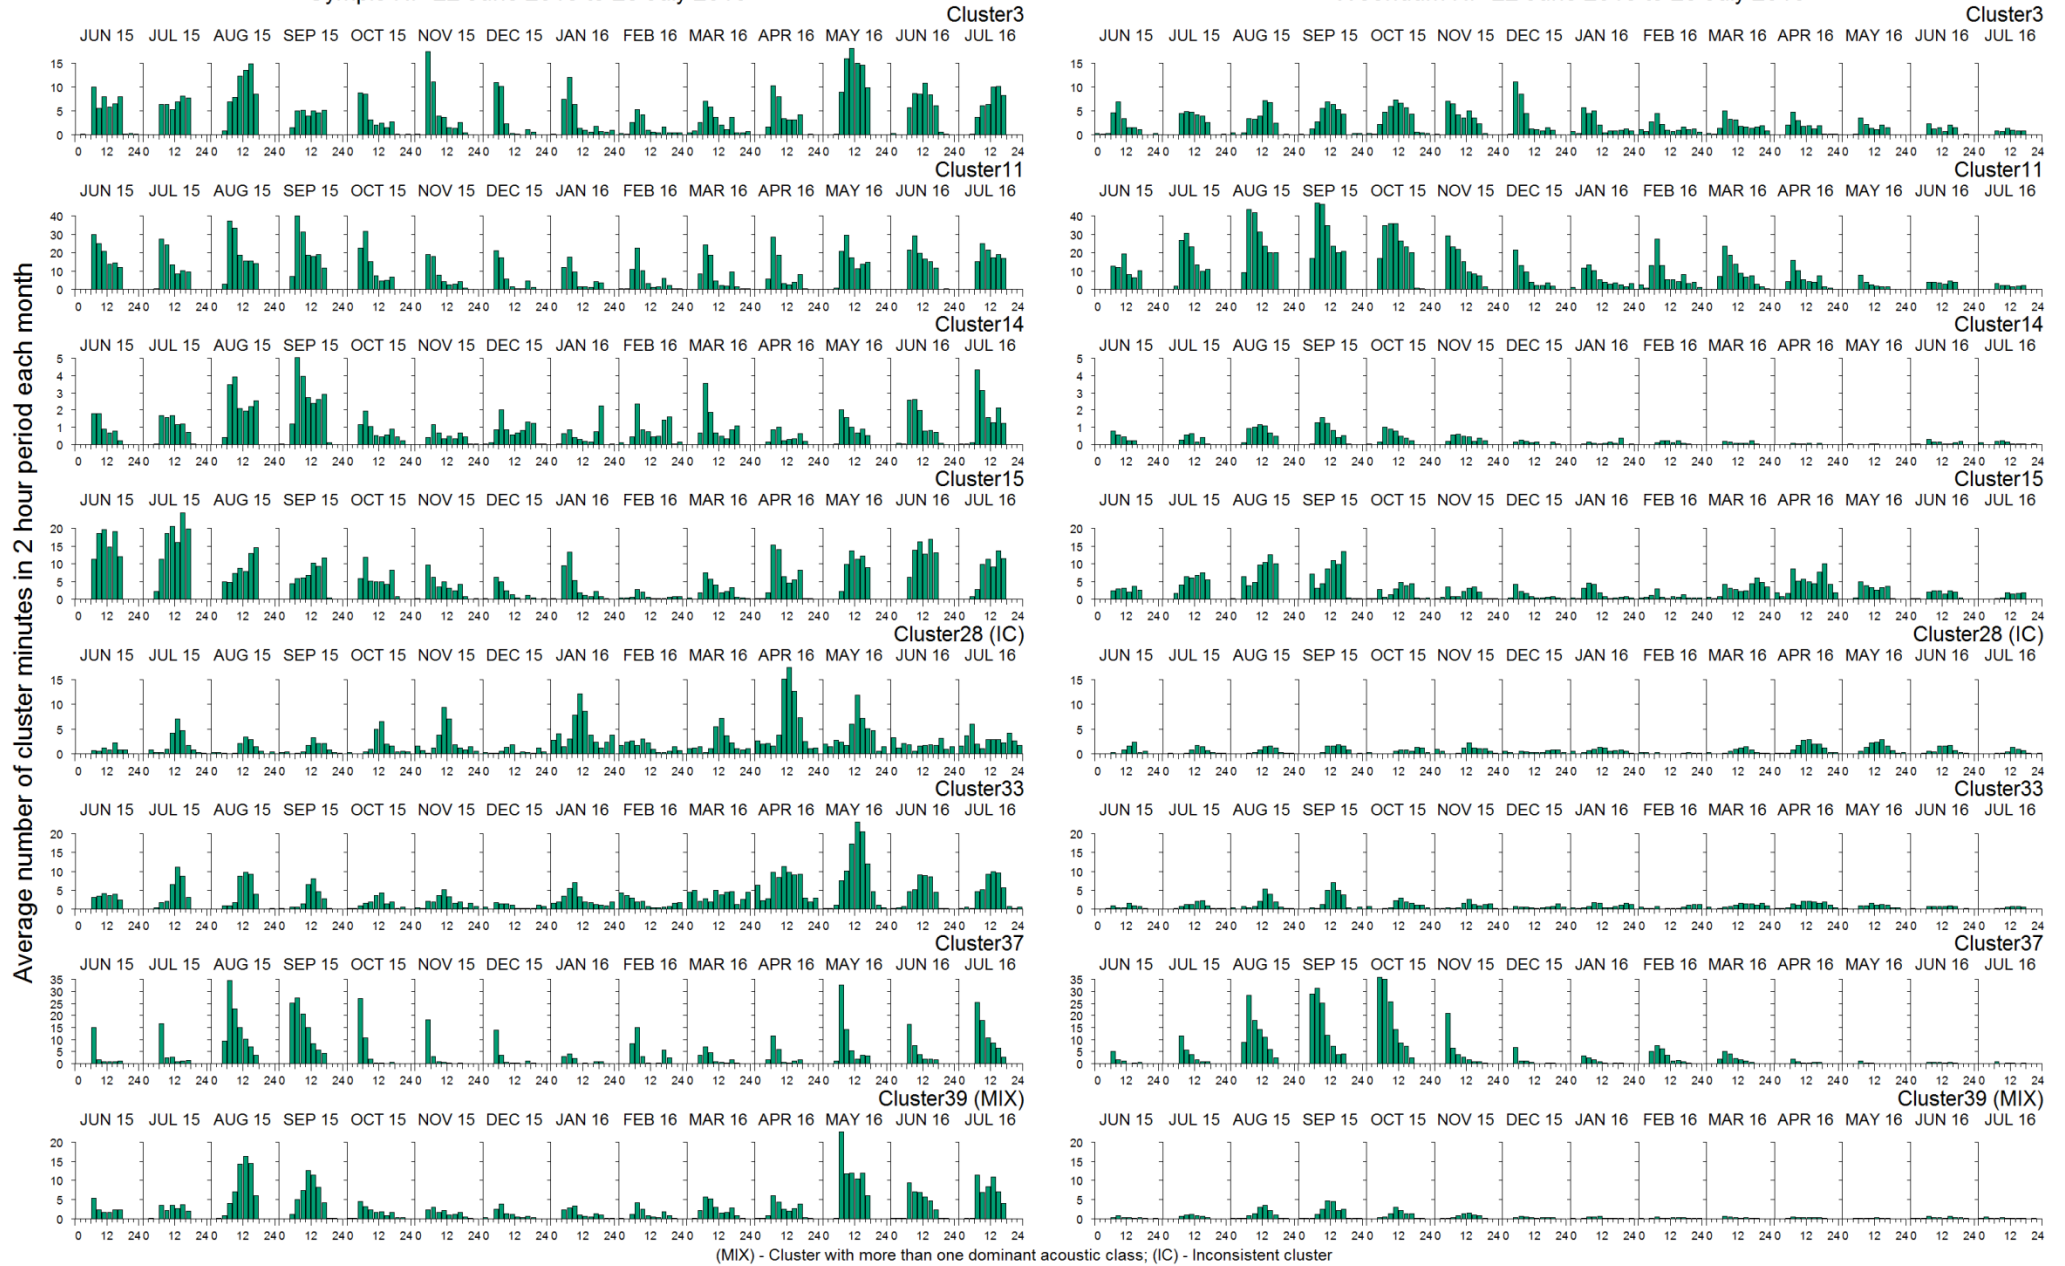

# BIRDS CLUSTERS CONTINUED (#43, 57, 58)

Average number of cluster minutes in 2 hour period

Gympie NP 22 June 2015 to 23 July 2016

Woondum NP 22 June 2015 to 23 July 2016

Cluster43

Cluster43

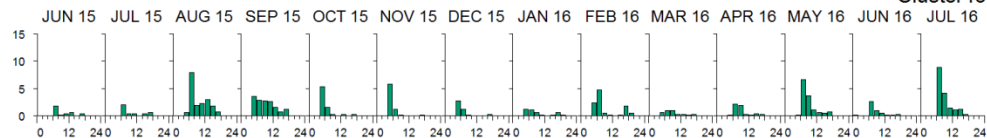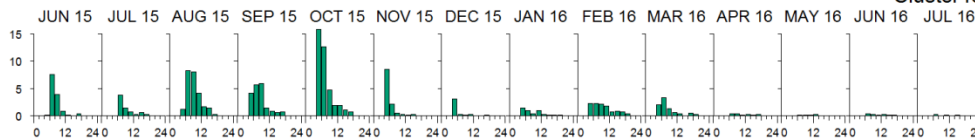

Cluster57 (IC)

Cluster57 (IC)

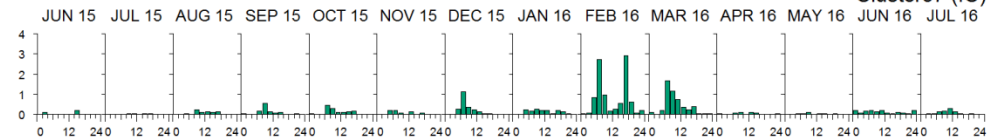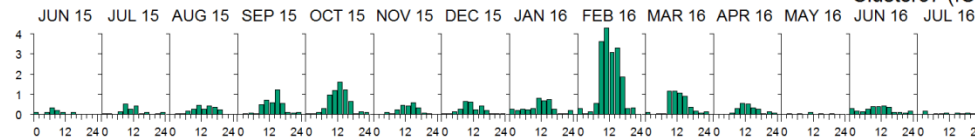

Cluster58

Cluster58

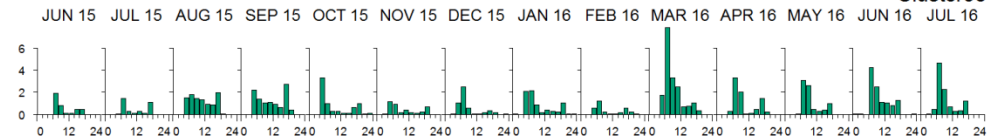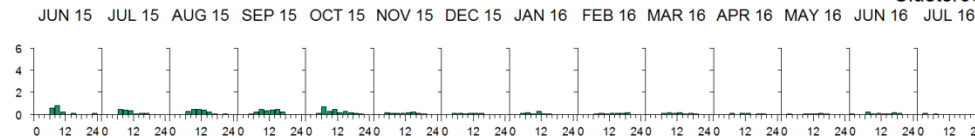

(MIX) - Cluster with more than one dominant acoustic class; (IC) - Inconsistent cluster

# INSECT CLUSTERS (#1, 4, 22, 26, 27, 29)

Gympie NP 22 June 2015 to 23 July 2016

Woondum NP 22 June 2015 to 23 July 2016

Average number of cluster minutes in 2 hour period each month

Cluster1

Cluster1

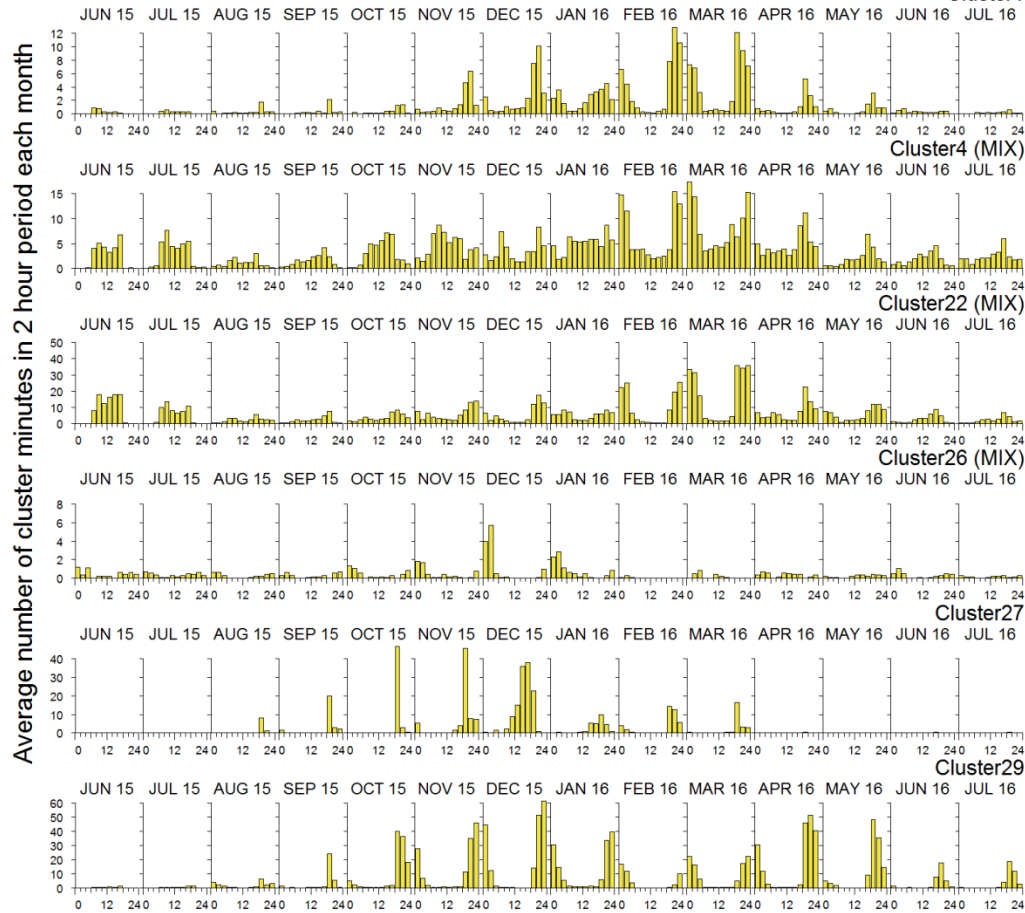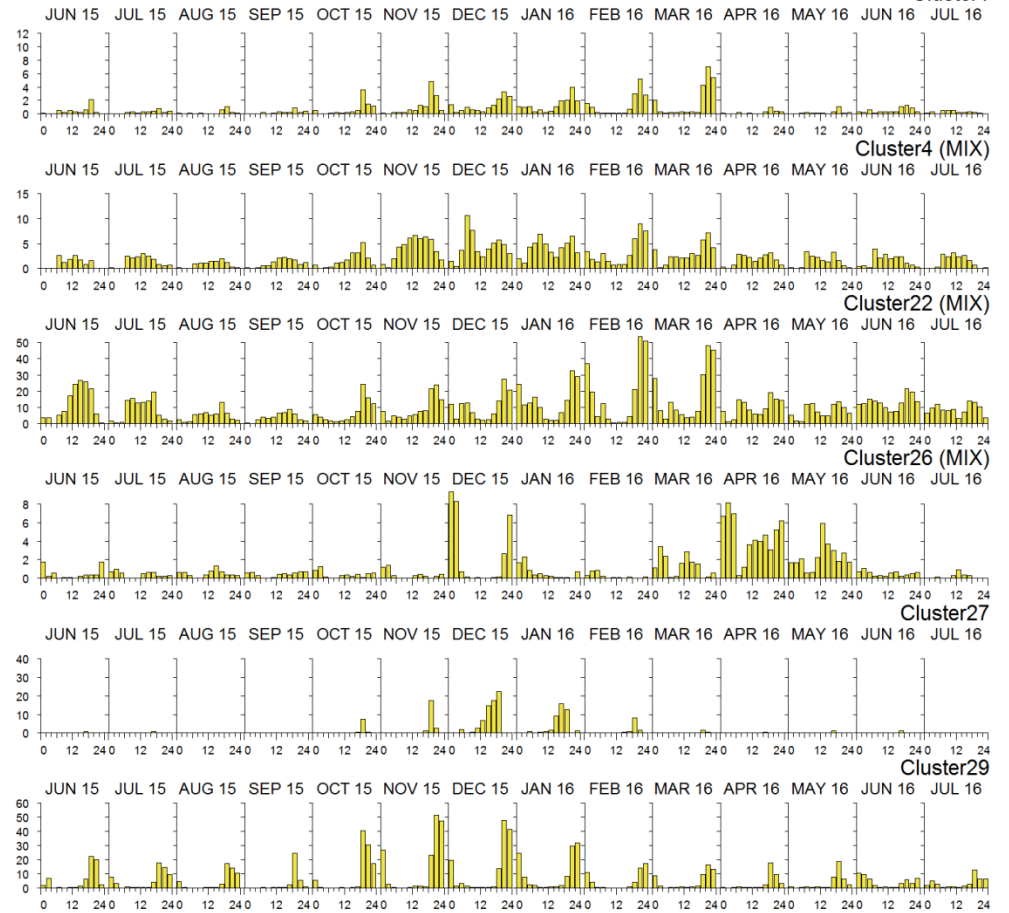

(MIX) - Cluster with more than one dominant acoustic class; (IC) - Inconsistent cluster



# CICADA CLUSTERS (#7, 8, 12, 16, 32, 34, 44, 48)

Gympie NP 22 June 2015 to 23 July 2016

Woondum NP 22 June 2015 to 23 July 2016

Average number of cluster minutes in 2 hour period each month

Cluster7 (MIX)

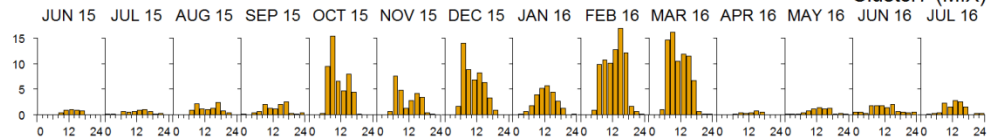

Cluster8 (MIX)

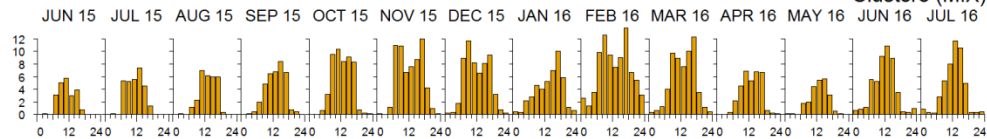

Cluster12

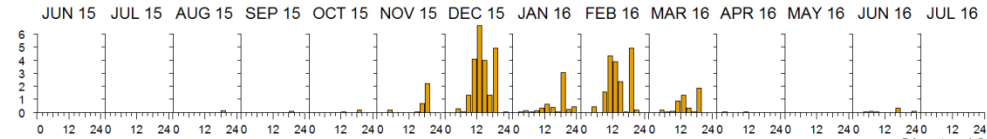

Cluster16

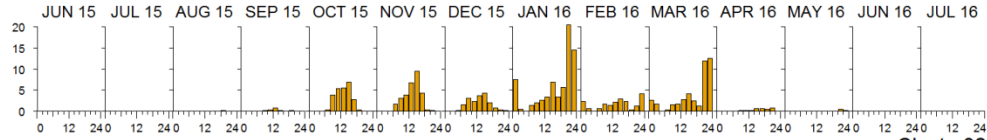

Cluster32

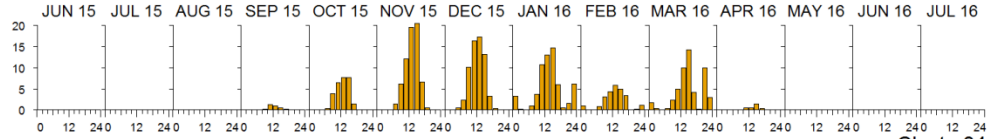

Cluster34

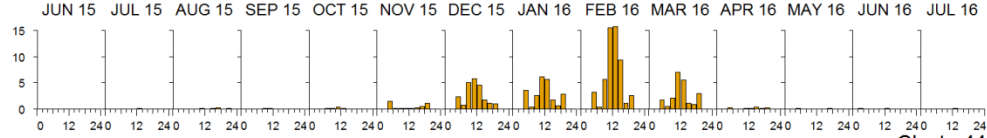

Cluster44

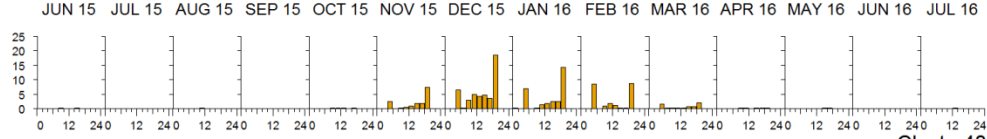

Cluster48

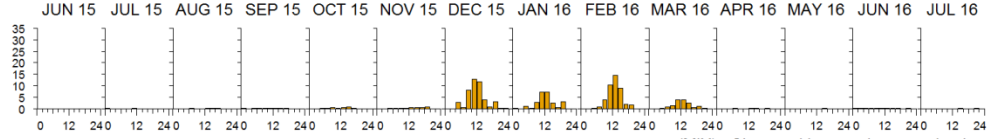

Cluster7 (MIX)

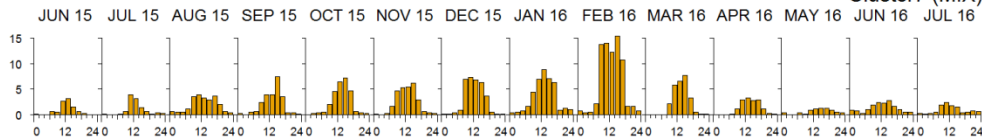

Cluster8 (MIX)

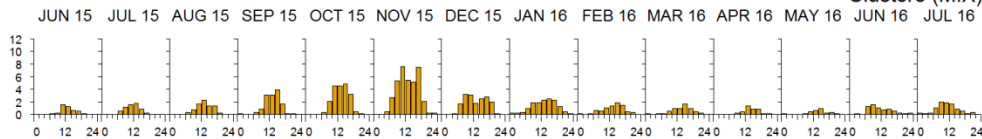

Cluster12

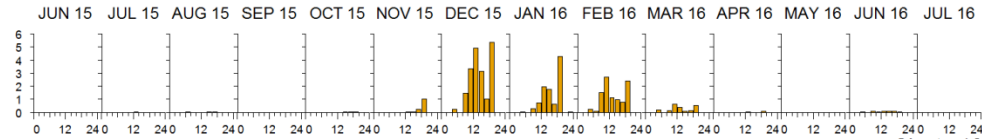

Cluster16

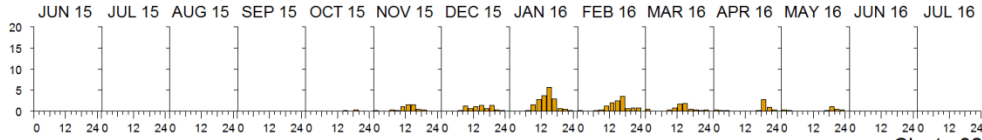

Cluster32

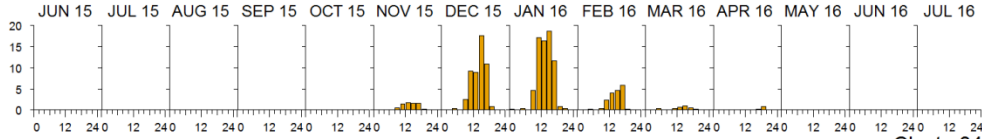

Cluster34

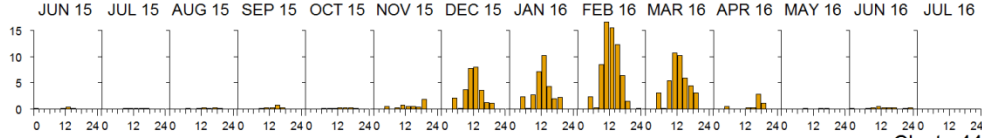

Cluster44

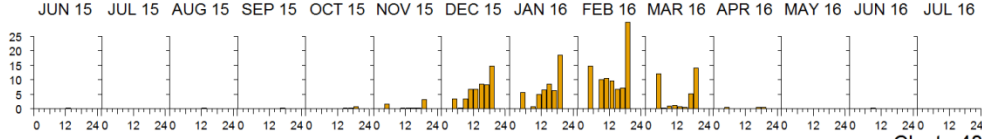

Cluster48

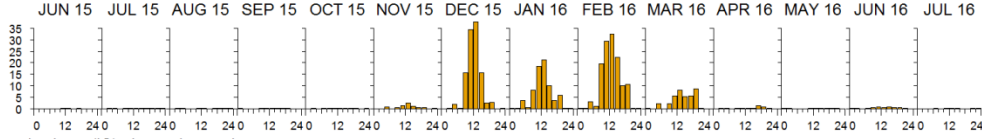

(MIX) - Cluster with more than one dominant acoustic class; (IC) - Inconsistent cluster

# RAIN CLUSTERS (#2, 10, 17, 18, 21, 54, 59, 60)

Gympie NP 22 June 2015 to 23 July 2016

Woondum NP 22 June 2015 to 23 July 2016

Average number of cluster minutes in 2 hour period each month

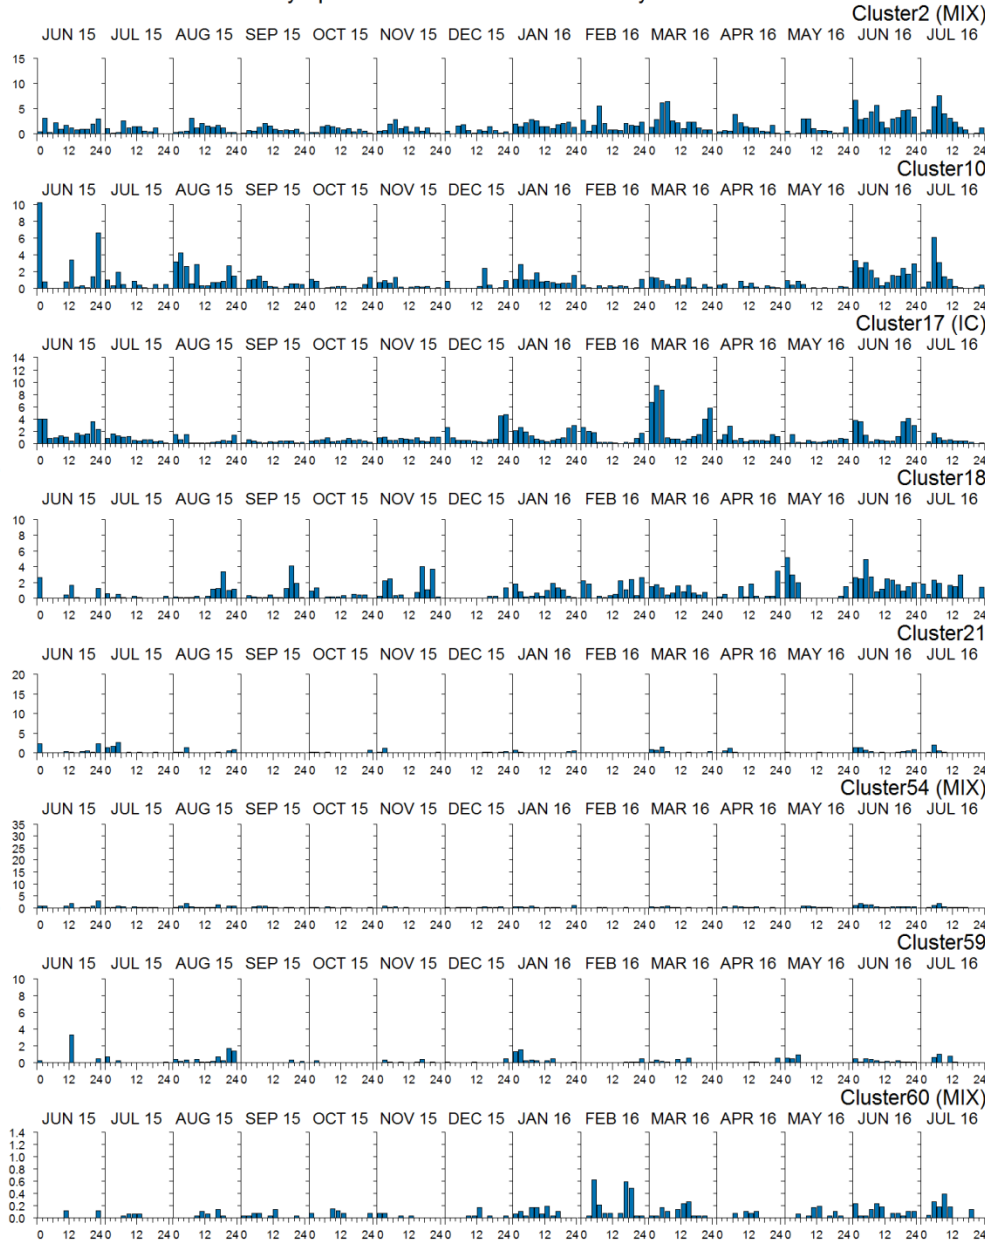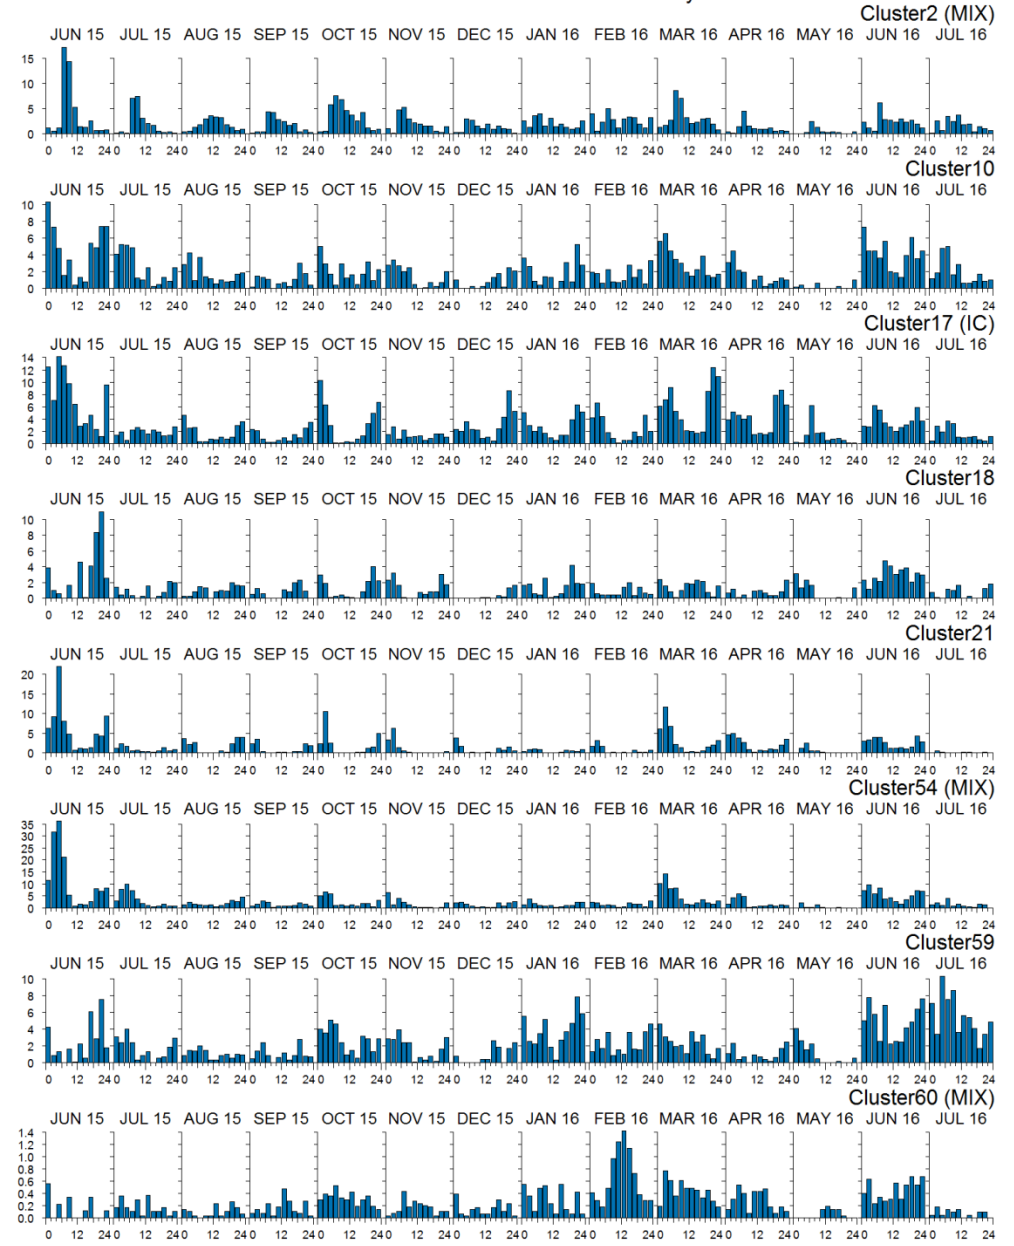

(MIX) - Cluster with more than one dominant acoustic class; (IC) - Inconsistent cluster

# WIND CLUSTERS (#9, 19, 20, 24, 25, 30, 40, 42)

Gympie NP 22 June 2015 to 23 July 2016

Woondum NP 22 June 2015 to 23 July 2016

Average number of cluster minutes in 2 hour period each month

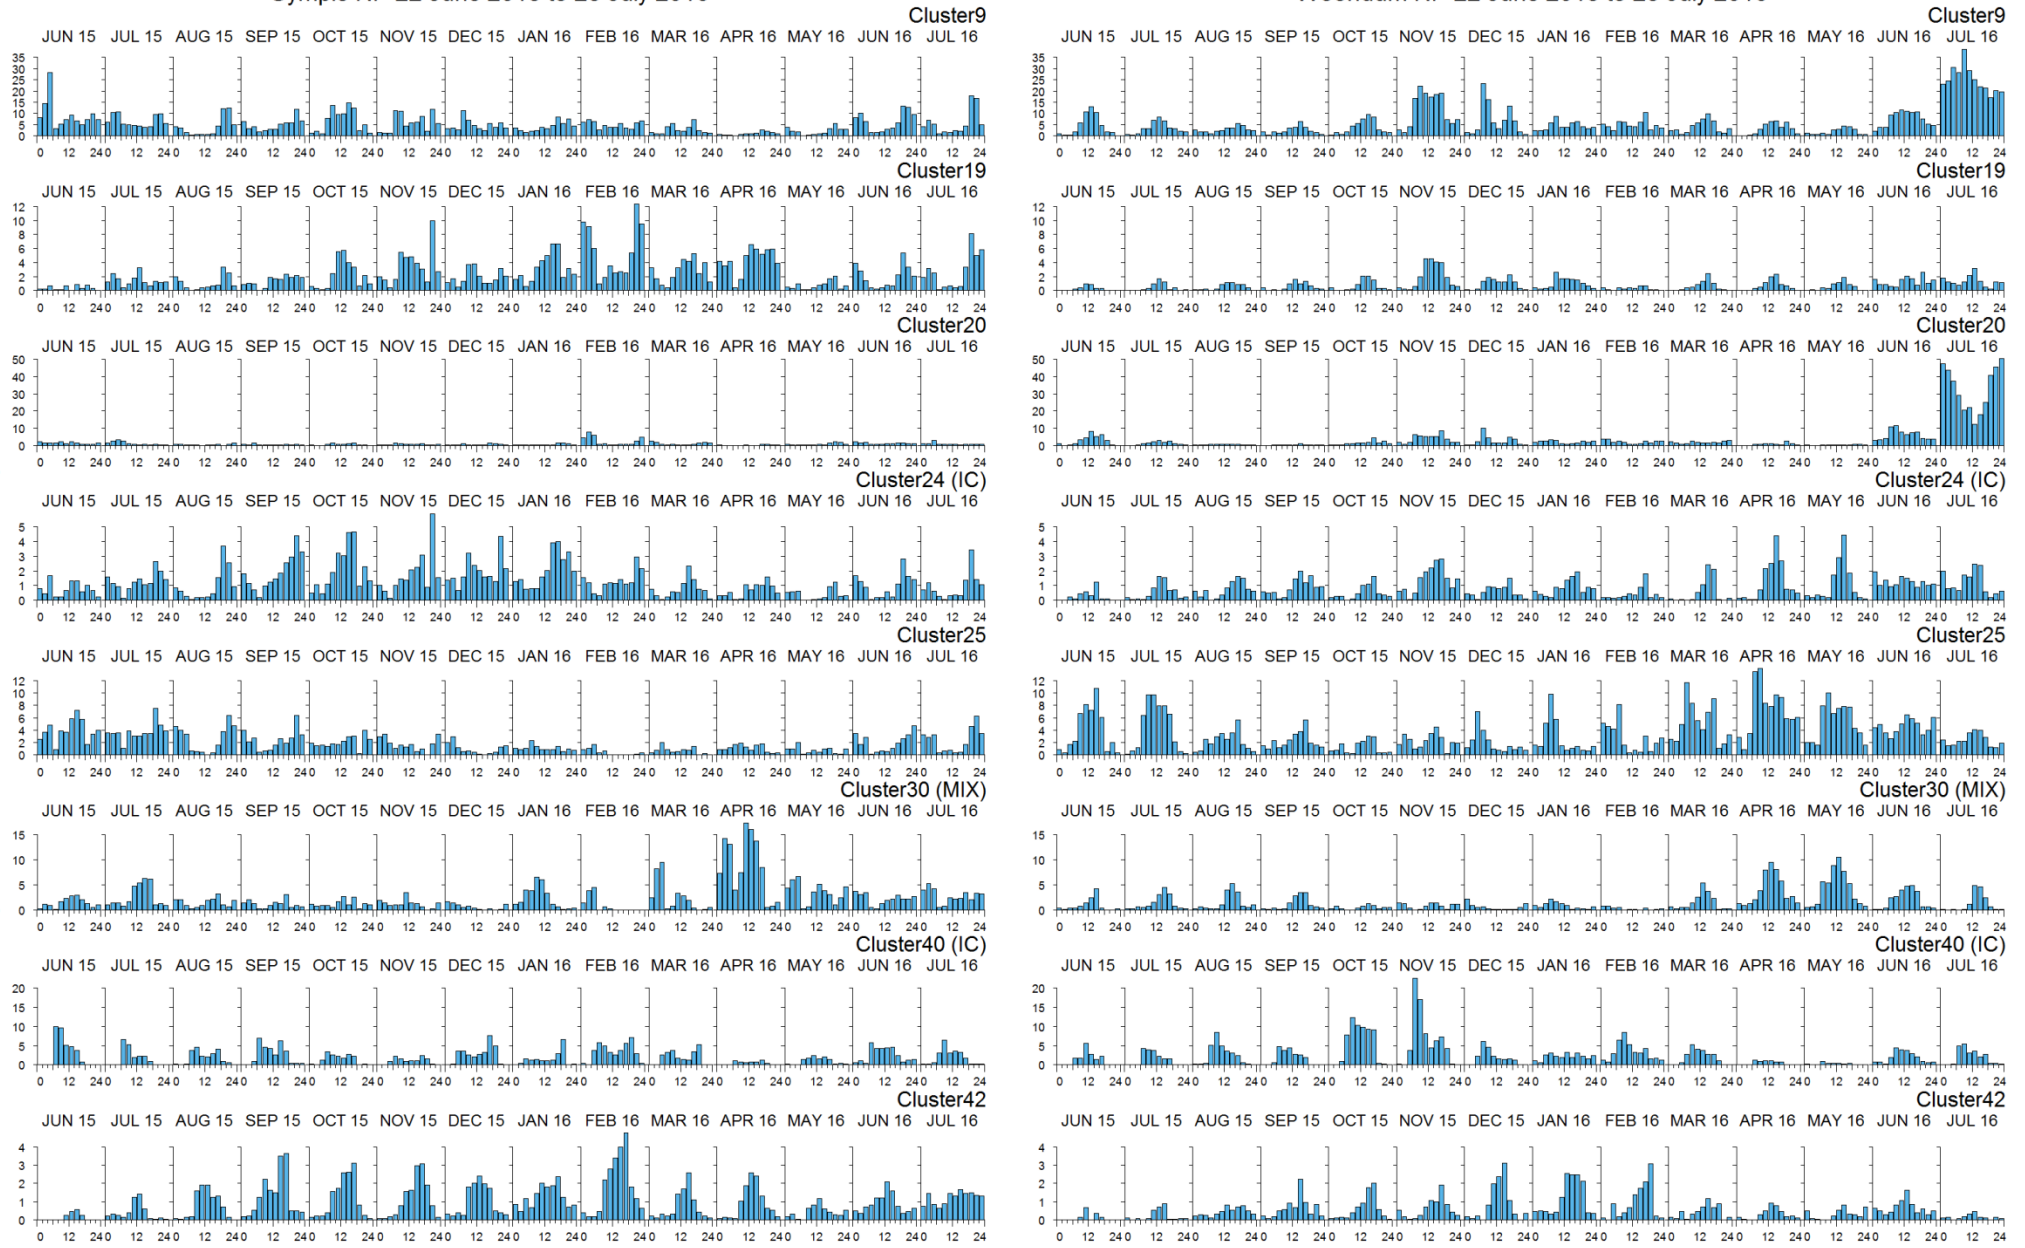

(MIX) - Cluster with more than one dominant acoustic class; (IC) - Inconsistent cluster

# WIND CLUSTERS CONTINUED (#45, 46, 47, 51, 52, 56)

Gympie NP 22 June 2015 to 23 July 2016

Woondum NP 22 June 2015 to 23 July 2016

Average number of cluster minutes in 2 hour period each month

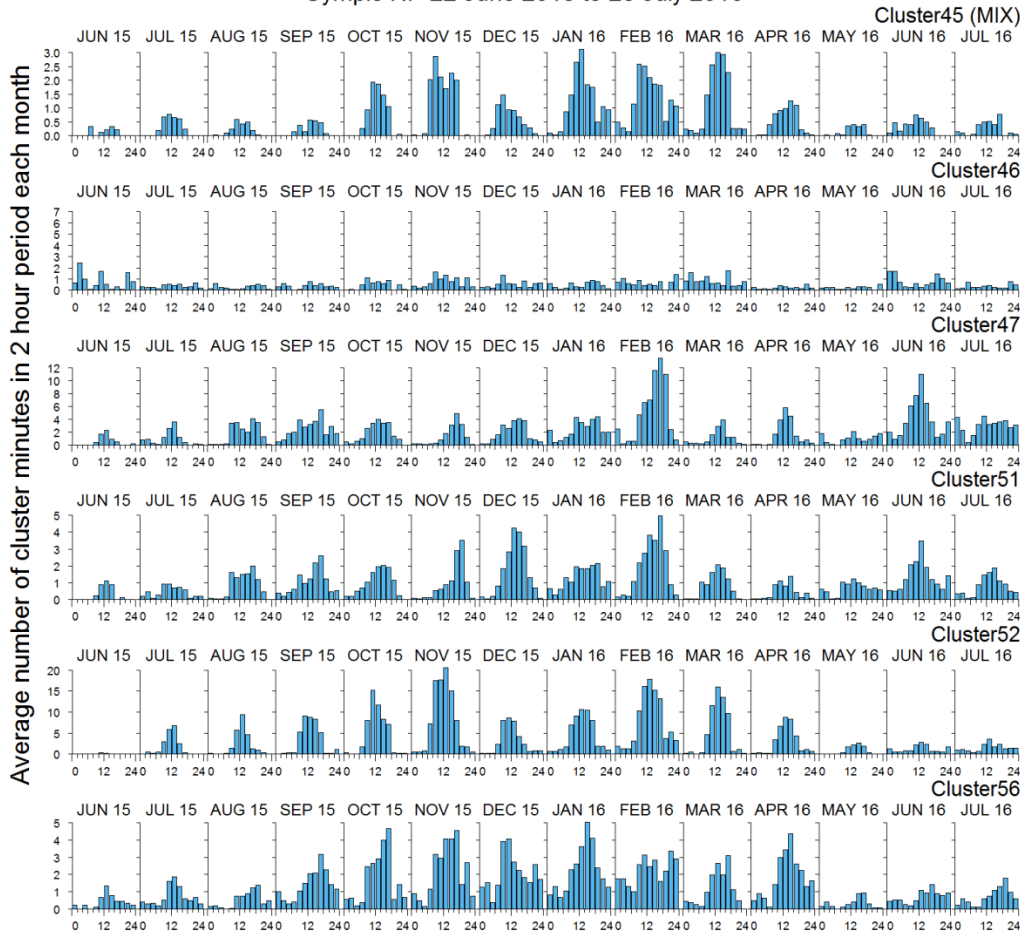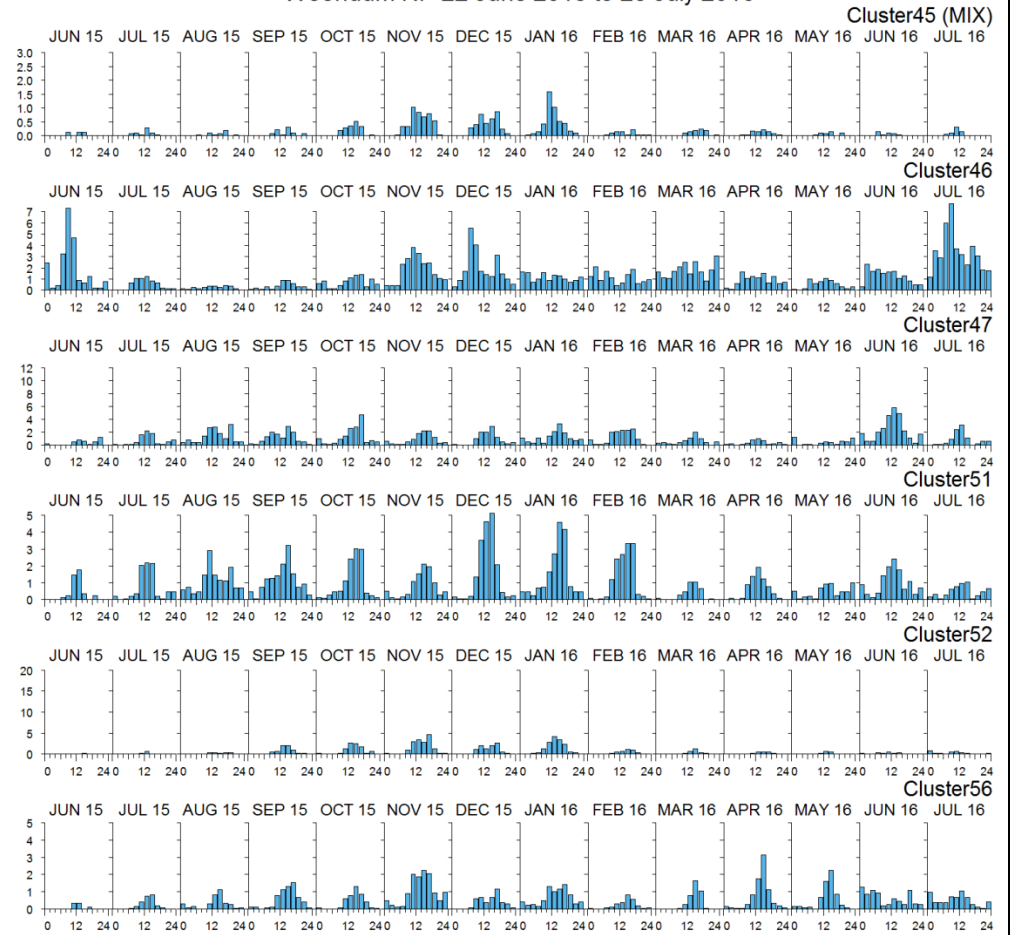

(MIX) - Cluster with more than one dominant acoustic class; (IC) - Inconsistent cluster



# QUIET CLUSTERS (#5, 6, 13, 31, 35, 38, 41)

Gympie NP 22 June 2015 to 23 July 2016

Woondum NP 22 June 2015 to 23 July 2016

Average number of cluster minutes in 2 hour period each month

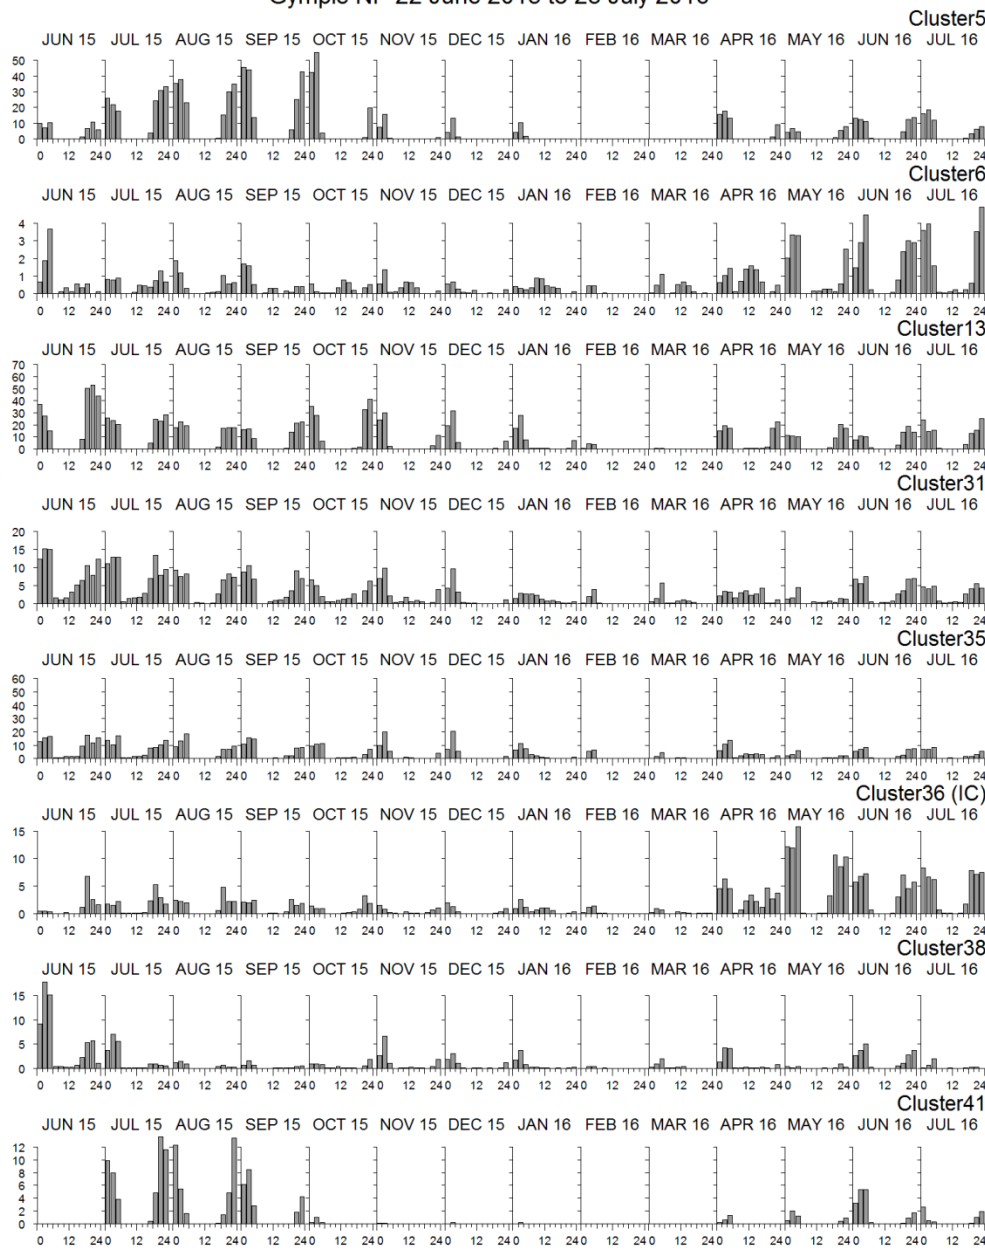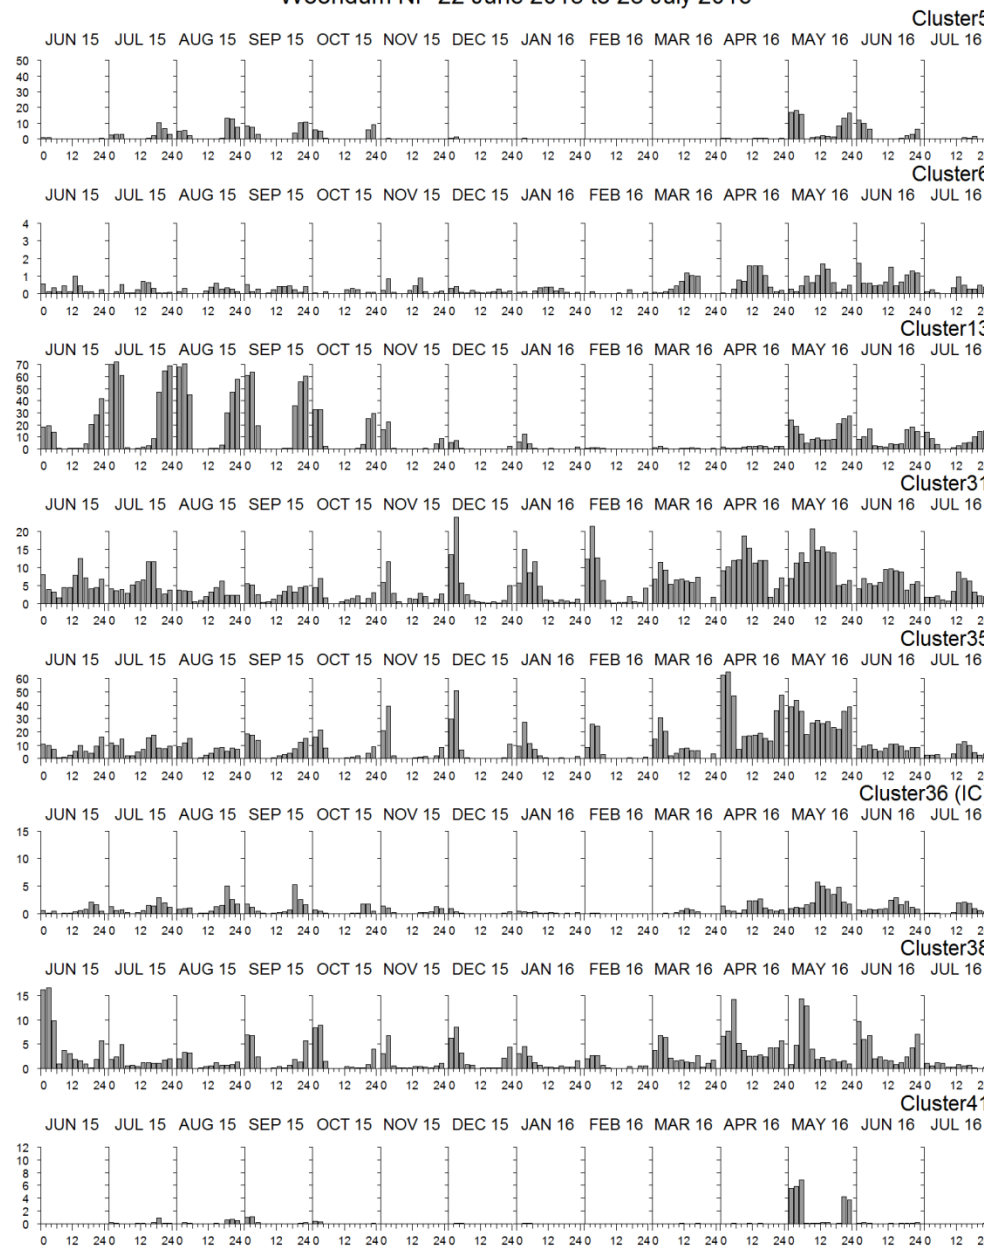

(MIX) - Cluster with more than one dominant acoustic class; (IC) - Inconsistent cluster

# QUIET CLUSTERS CONTINUED (#50, 53, 55)

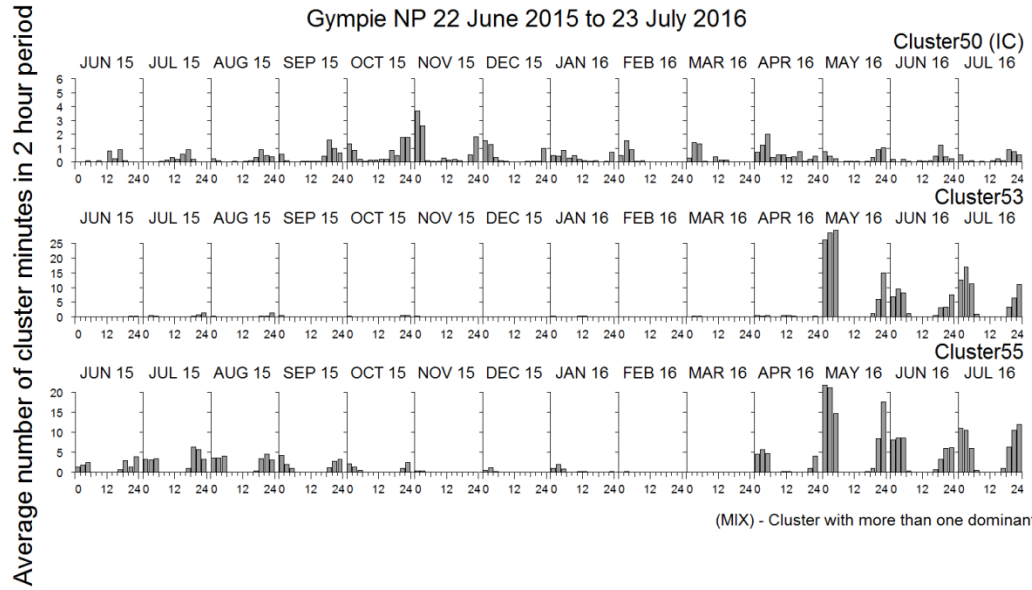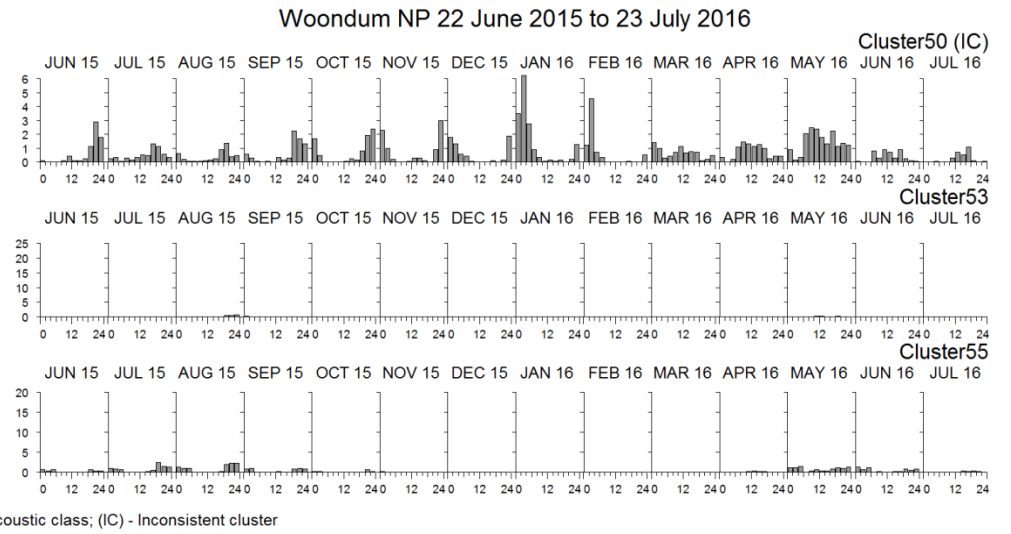

# PLANE CLUSTERS (#23, 49)

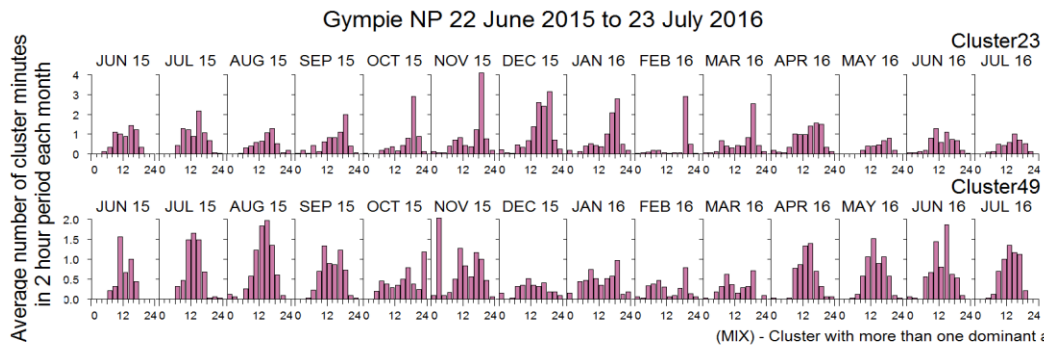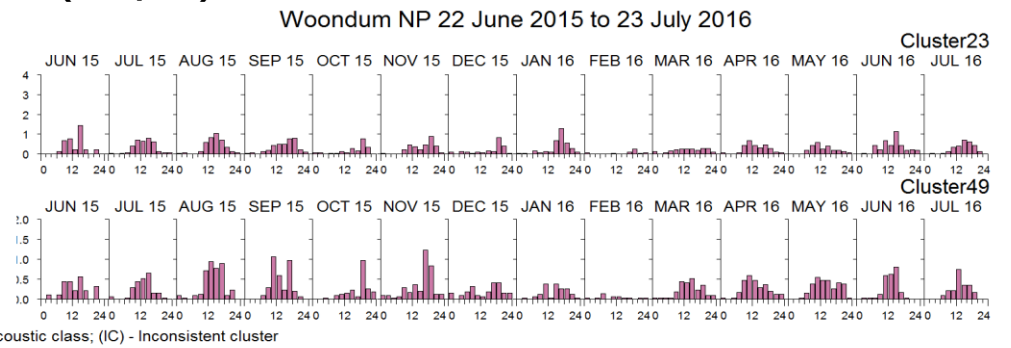

## Section B: Polar Histogram for both sites

Two polar histogram plot displaying the proportion of the acoustic classes in each of the 398 days from the 22 June 2015 to the 23 July 2016 one from Gympie National Park and the other from Woondum National Park.

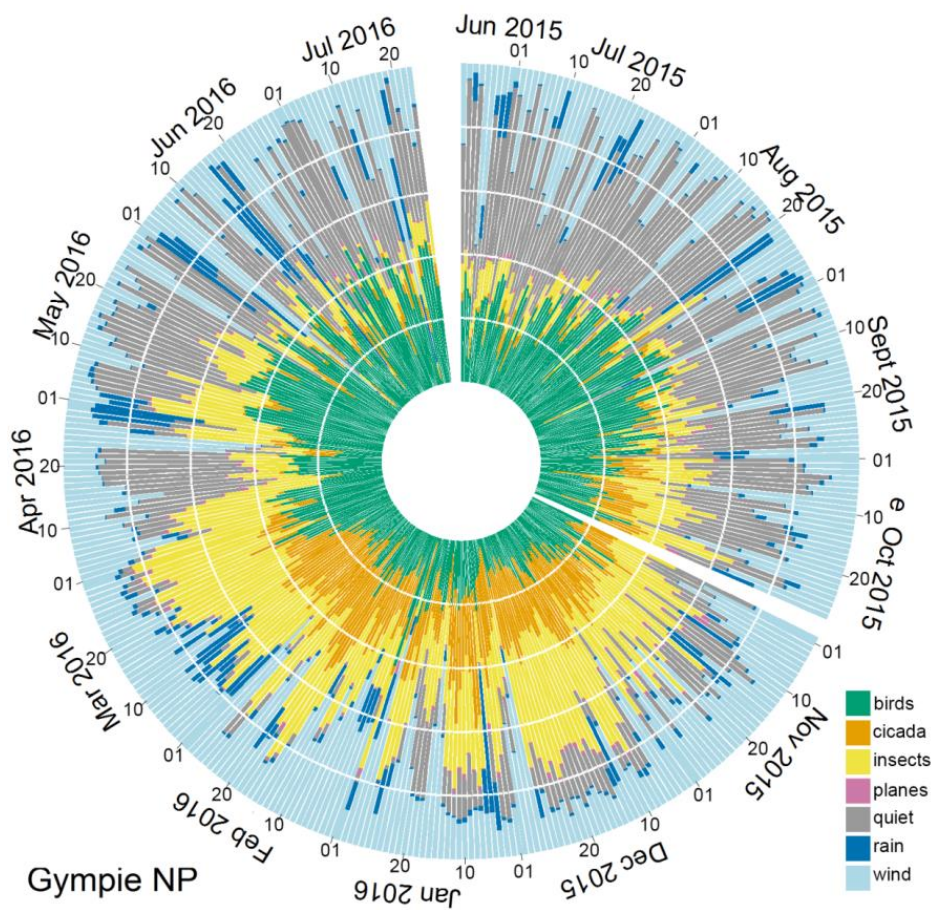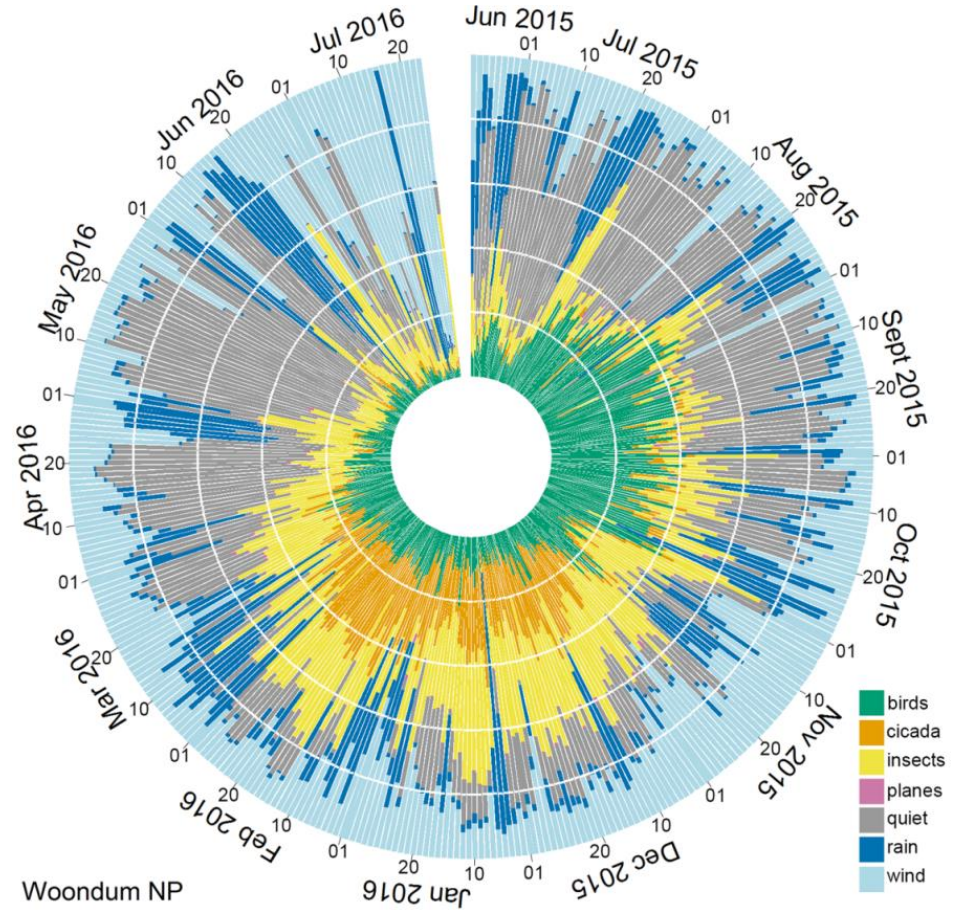



## Section C: Radar Plots

The complete set of Radar Plots, one for each cluster displaying the medioids of each cluster

1. Forty-two clusters are dominated by a single acoustic class. The other clusters are mixtures of acoustic classes.
2. For a list of the contents of each cluster see page one of S2 Sample minutes.

### Bird Clusters

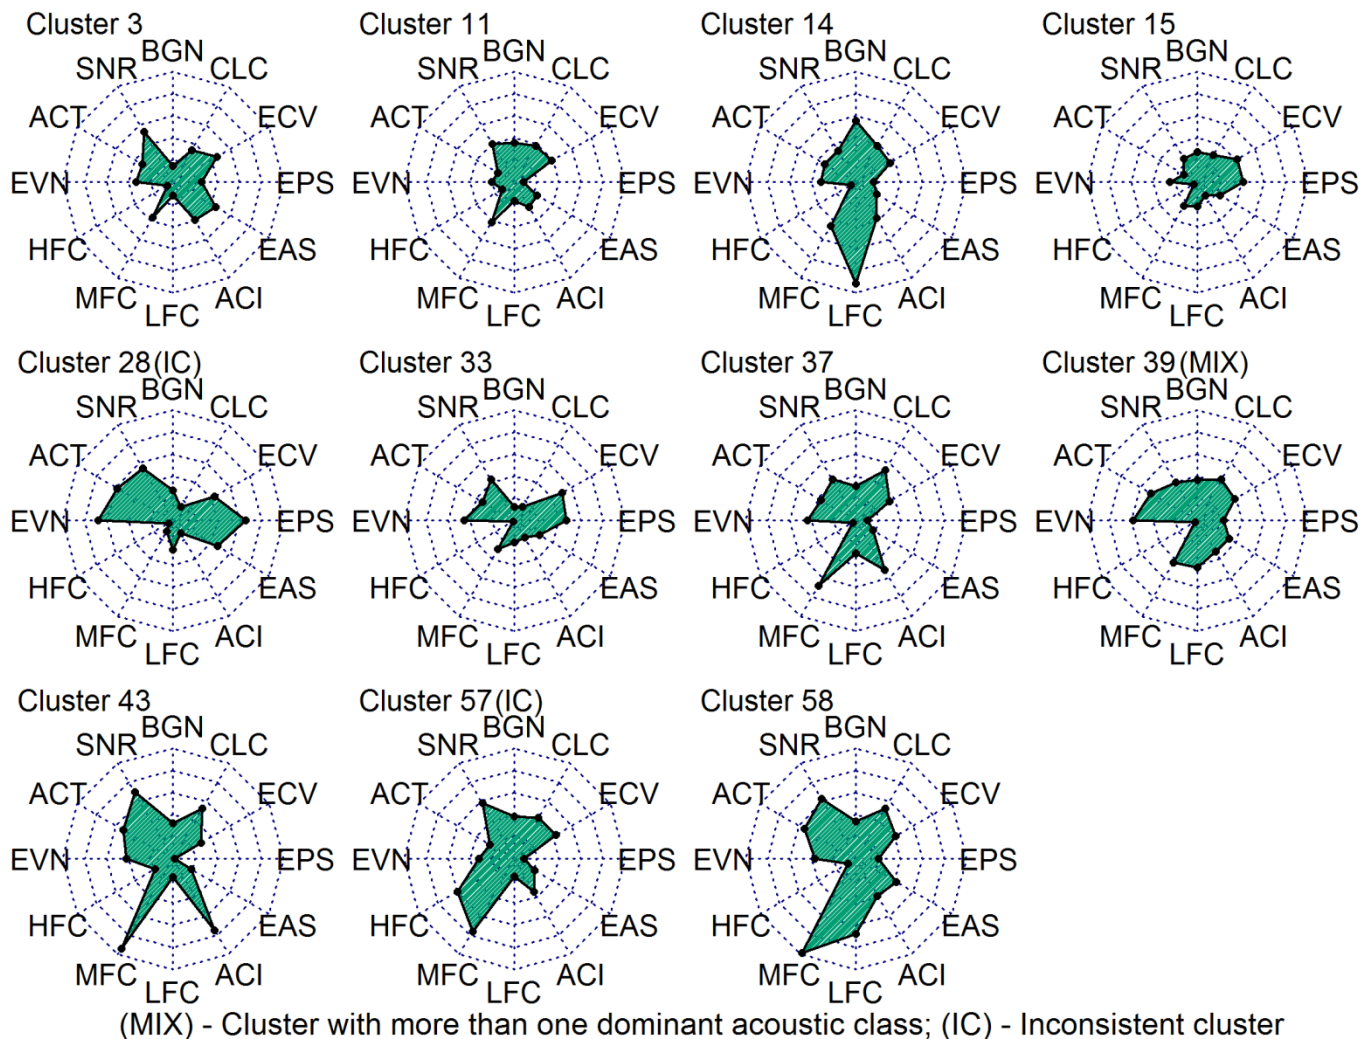

### Plane Clusters

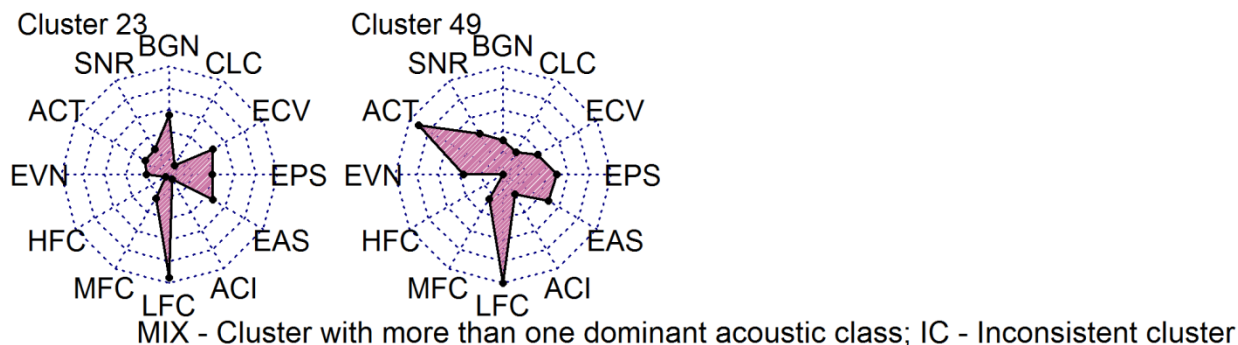

## Insect Clusters

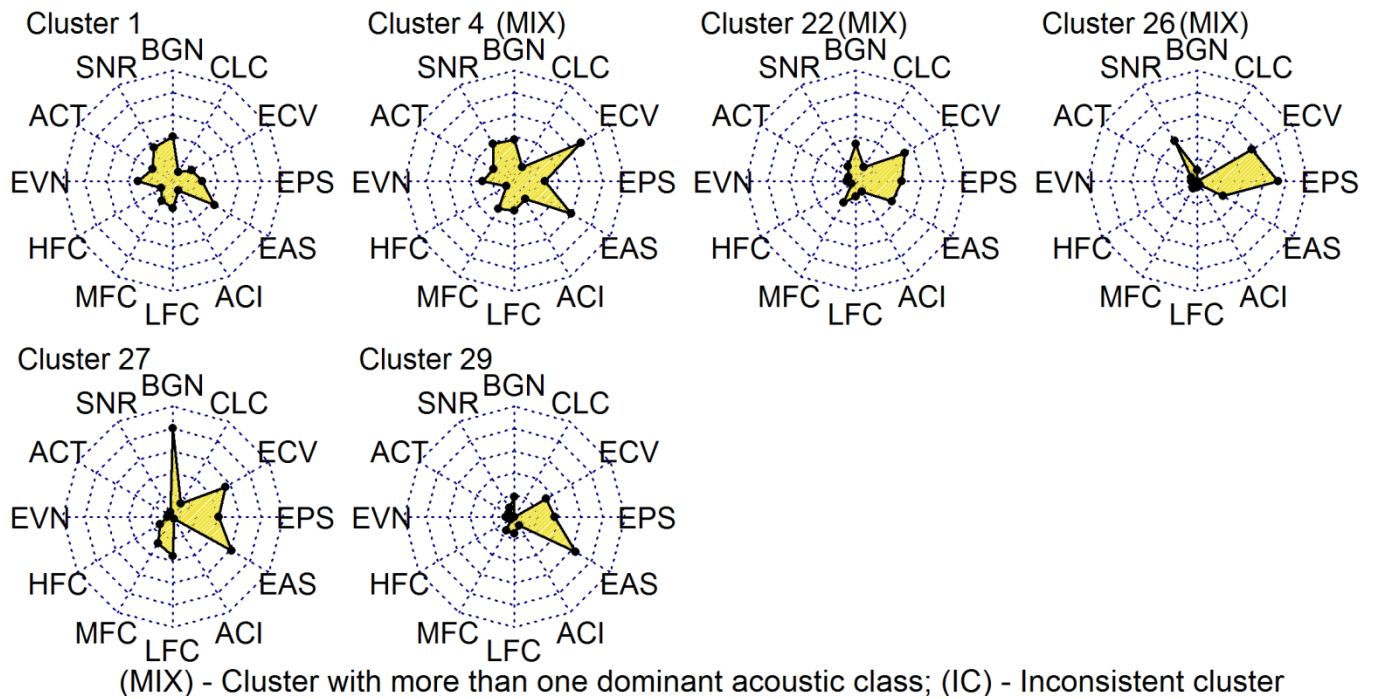

## Cicada Clusters

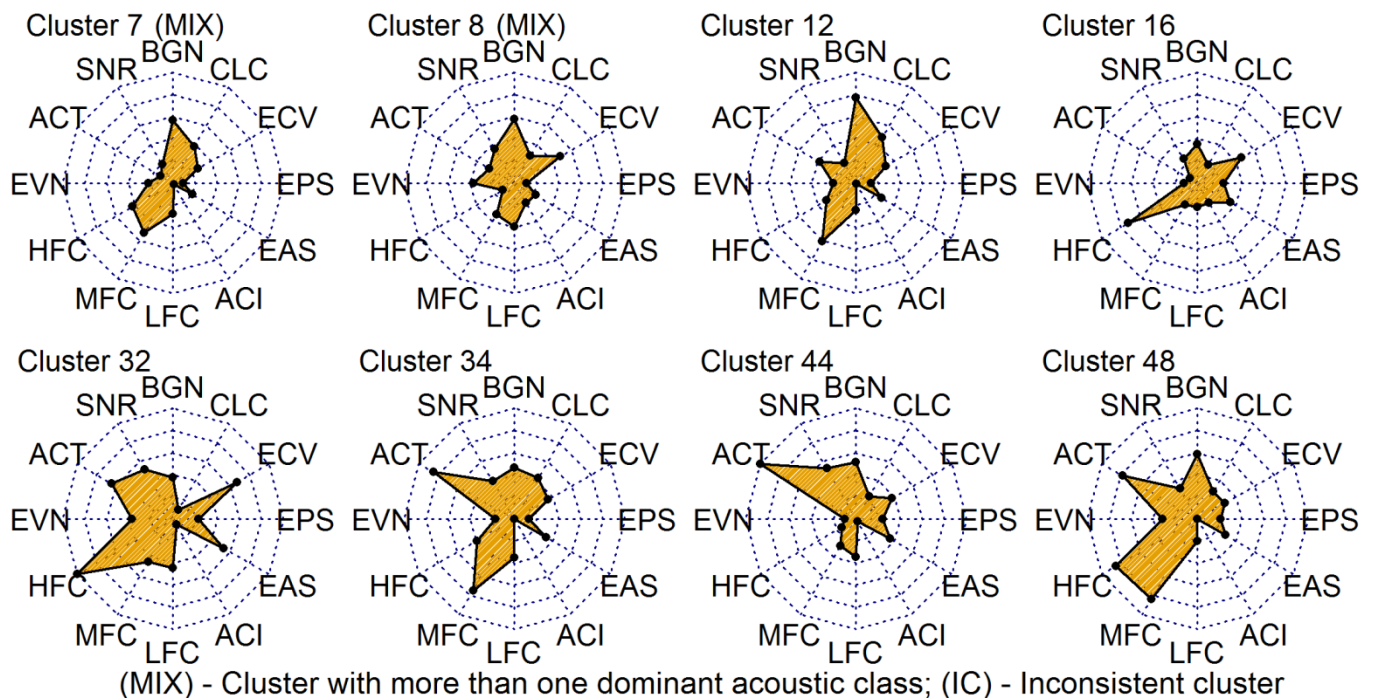

## Rain Clusters

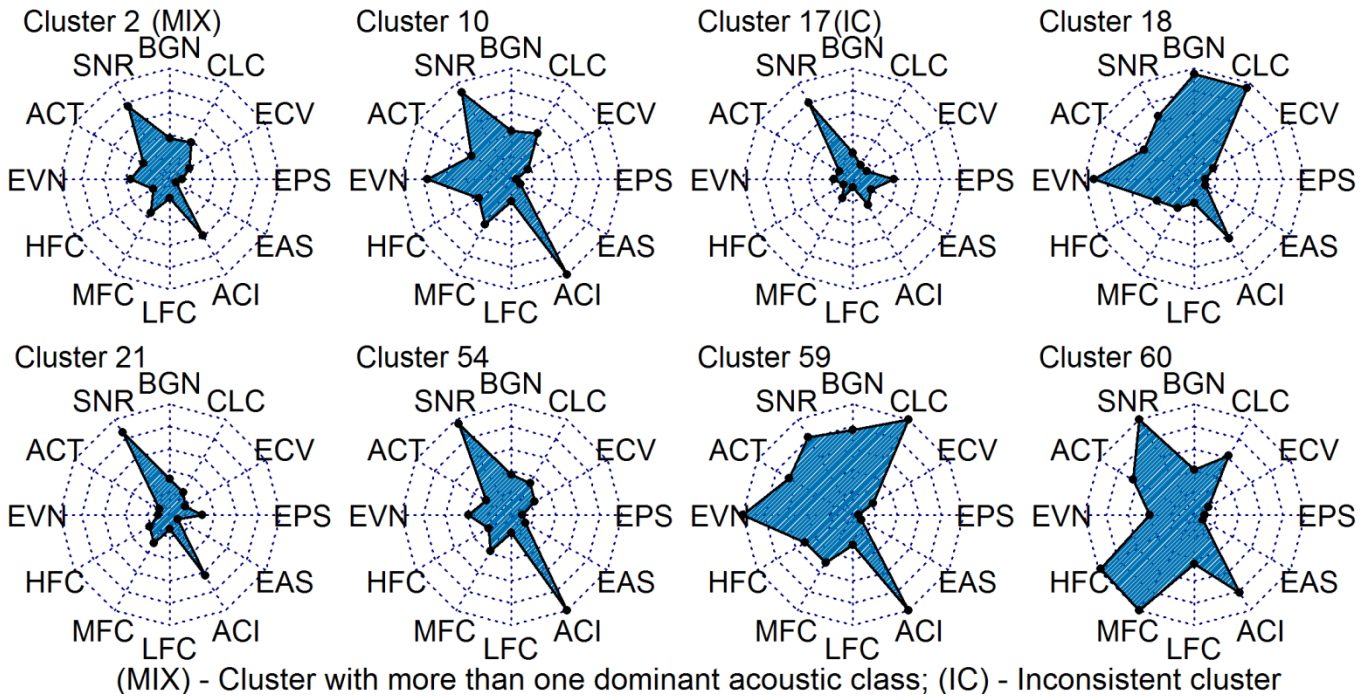

## Quiet Clusters

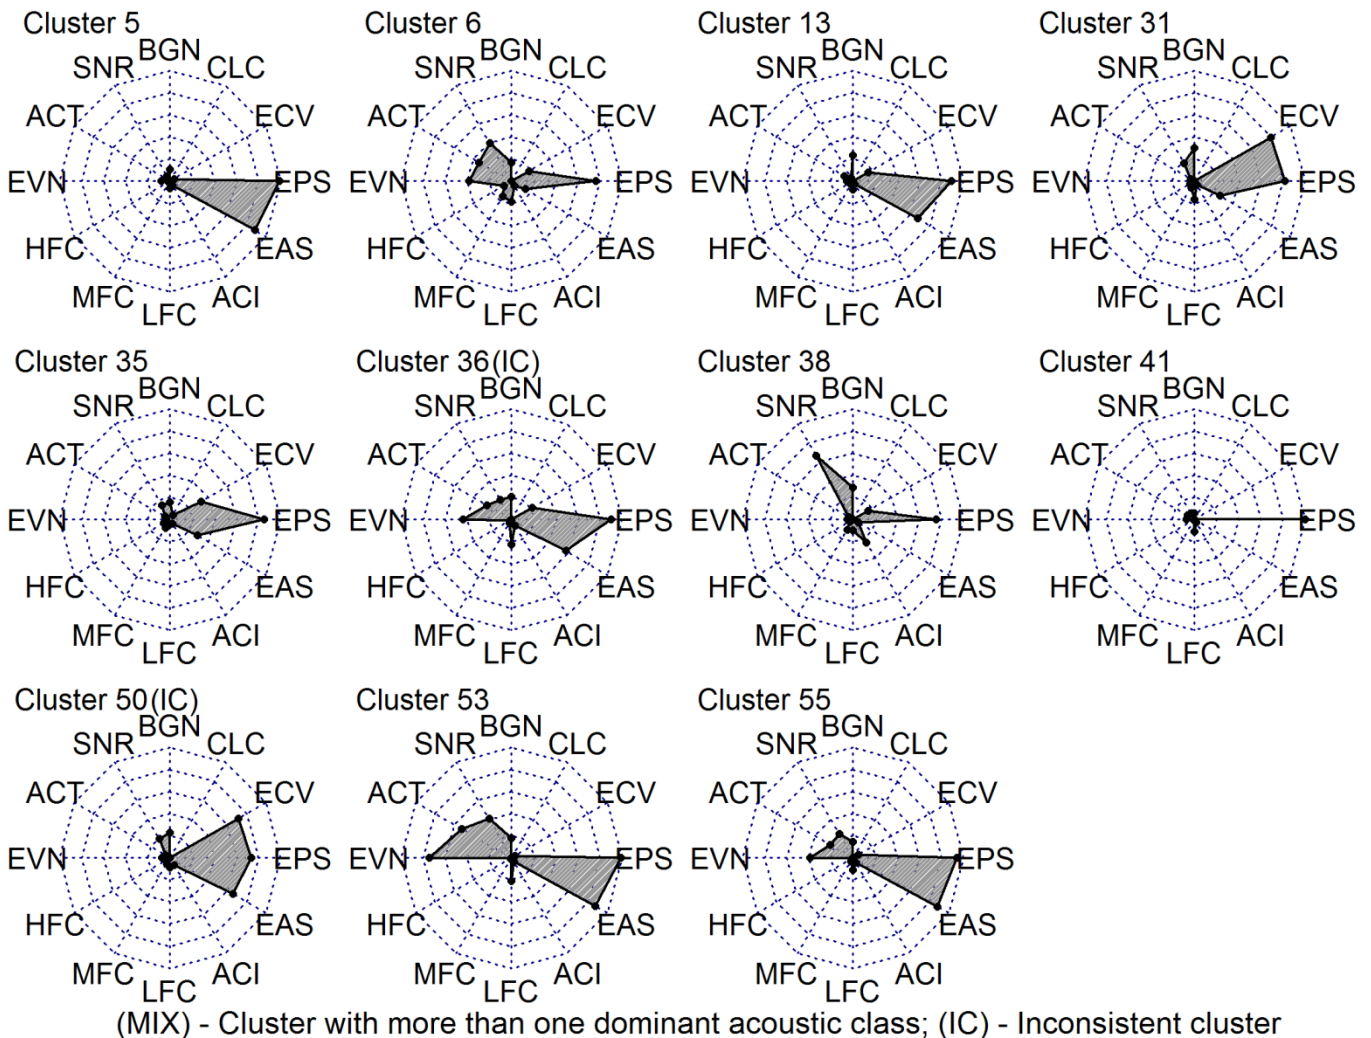



# Wind Clusters

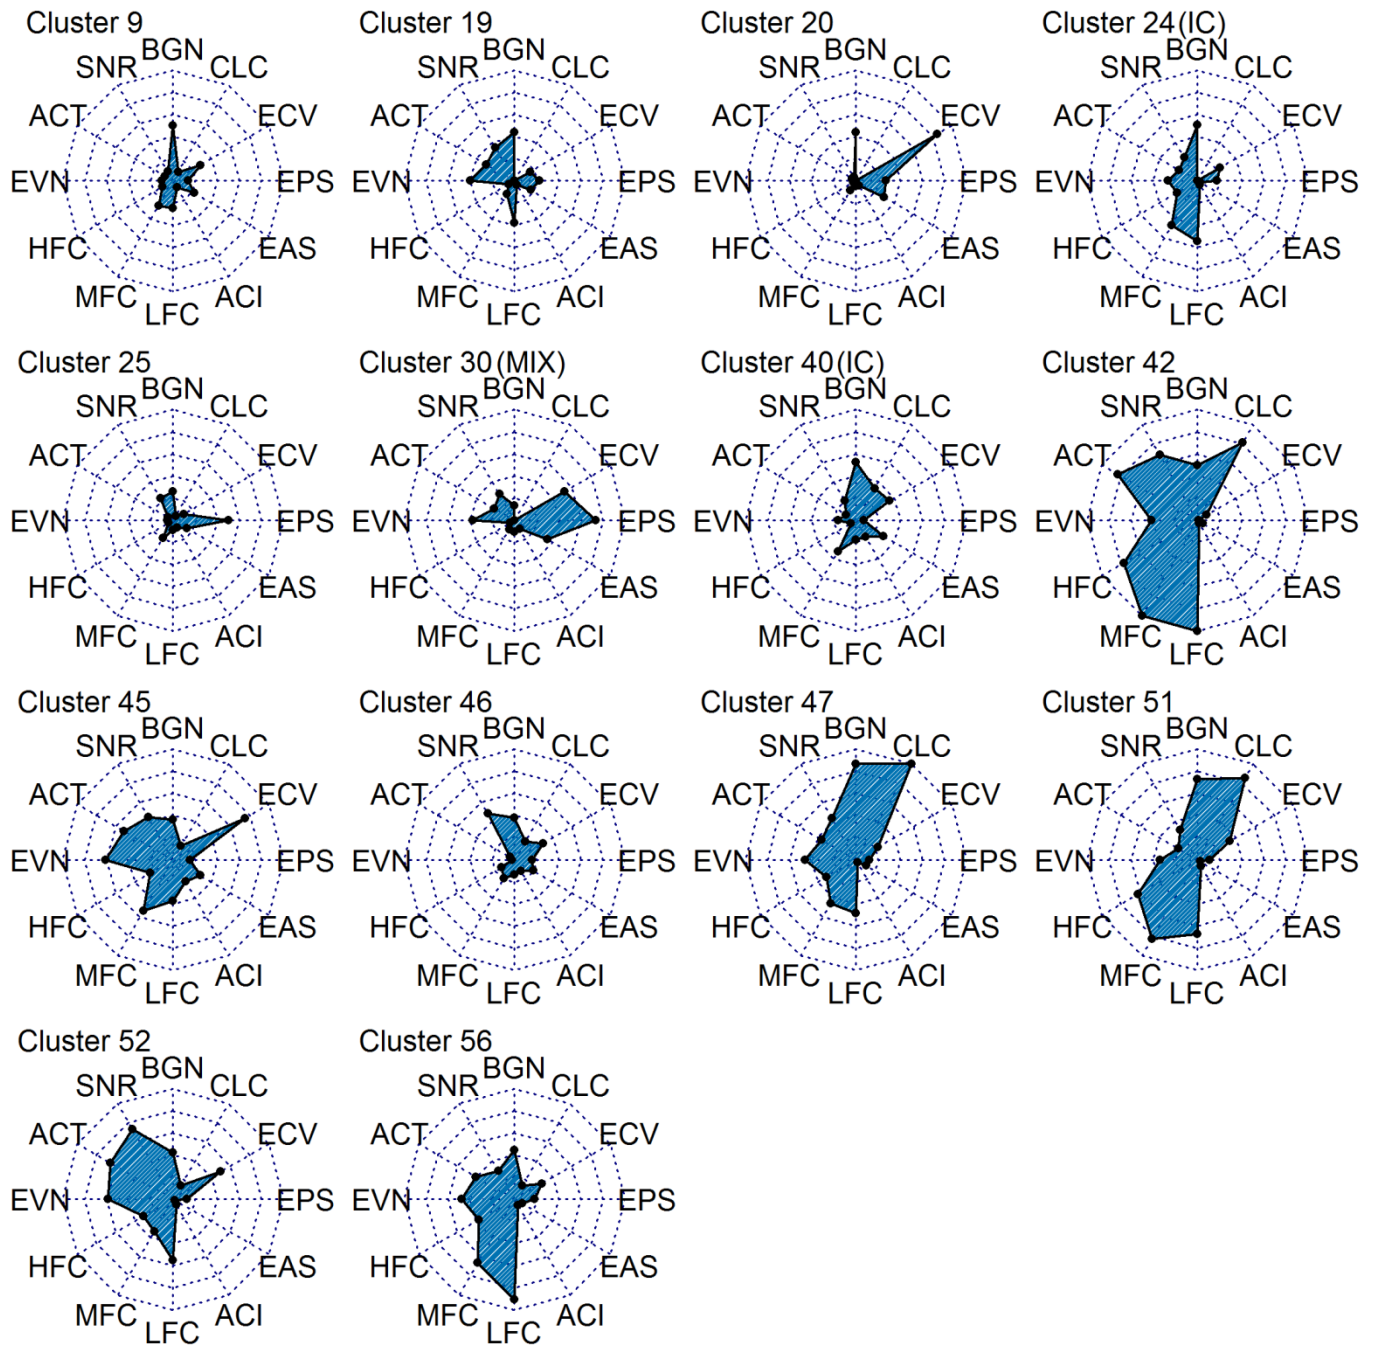

(MIX) - Cluster with more than one dominant acoustic class; (IC) - Inconsistent cluster

## Section D: Boxplots

**Contents:** The boxplot statistics of each of the twelve summary acoustic indices for a selection of clusters in each acoustic class. The original indices were normalised between 1.5 and 98.5 percentiles and scaled [0,1].

### 1. BIOPHONY

#### BIRDS

These bird clusters have moderate values for the Acoustic Complexity Index (ACI) and low to moderate values for Cluster count (CLC). The mid-frequency cover (MFC) ranges from moderate to high as is the signal to noise ratio (SNR). The high-frequency cover (HFC) is generally low because most bird calls fall into the frequency band (482-4000 kHz) used to calculate the mid-frequency cover index. There is some elevation of low-frequency cover (LFC) in clusters 14 and 58 which is possibly due to planes.

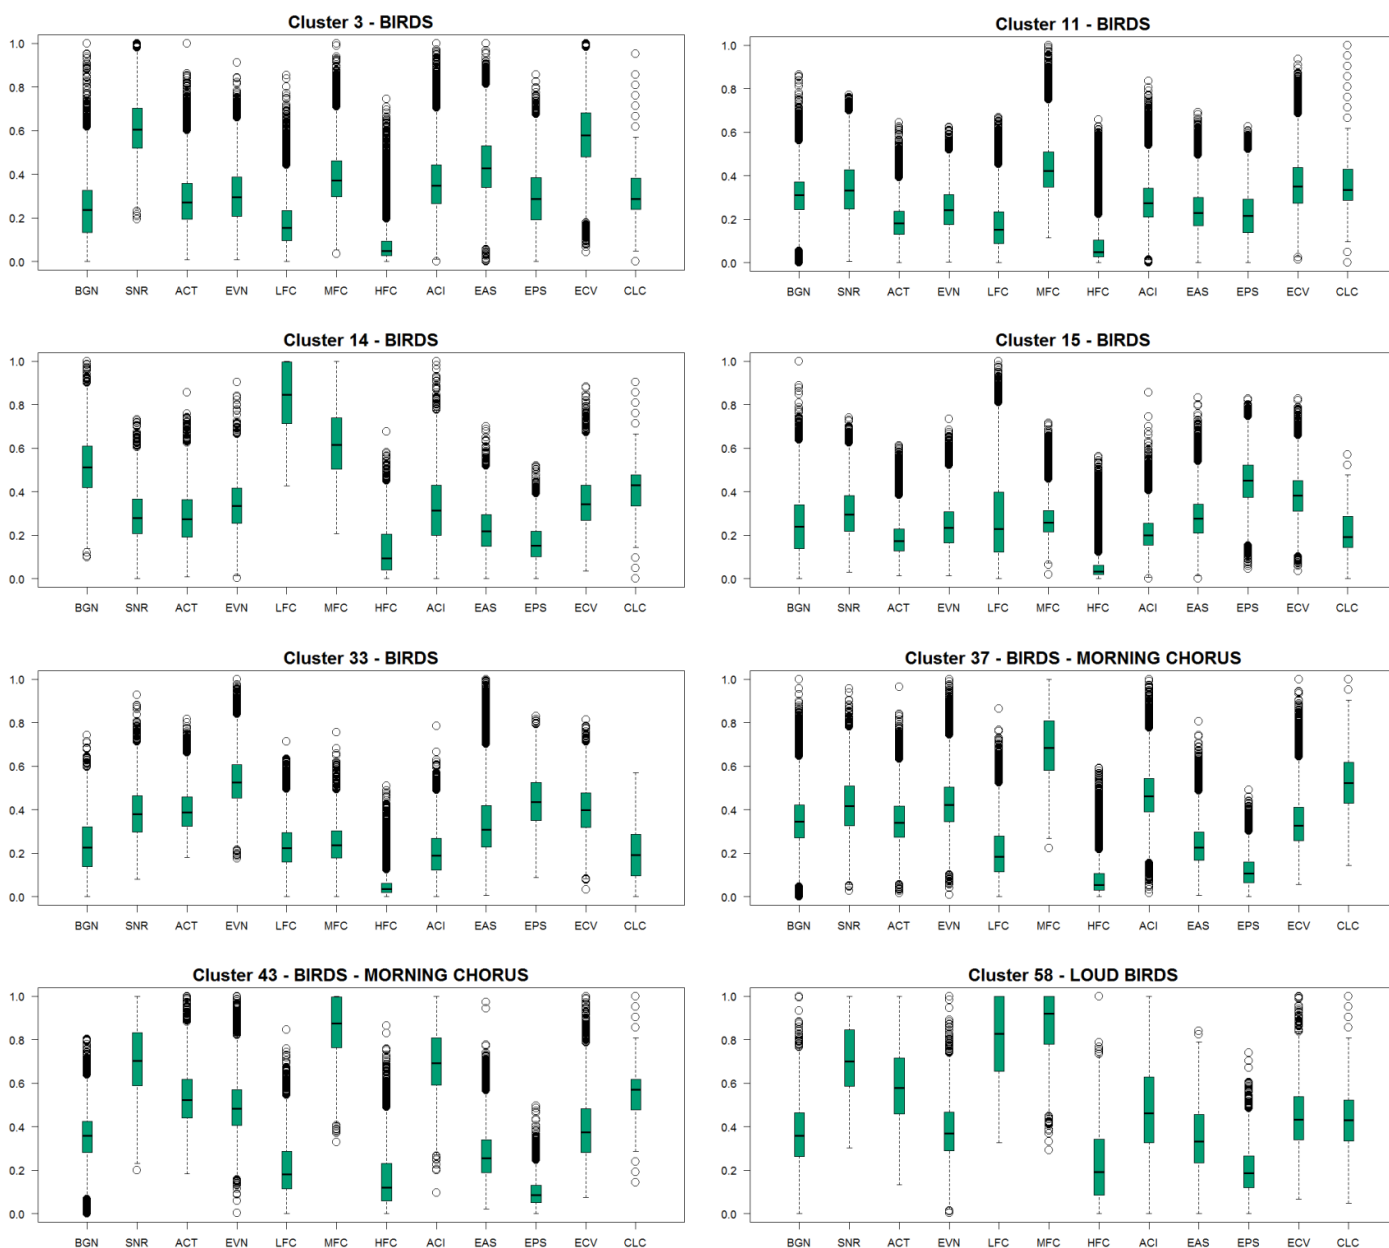

# INSECTS

These insect clusters have low values for most summary indices.

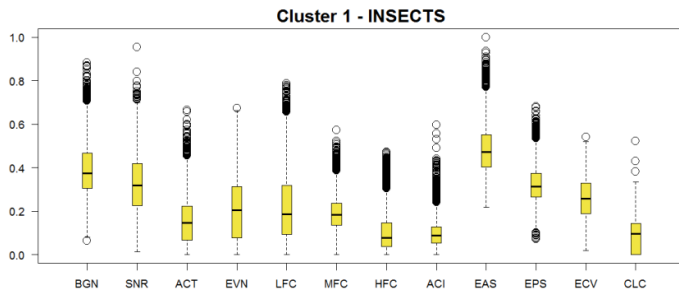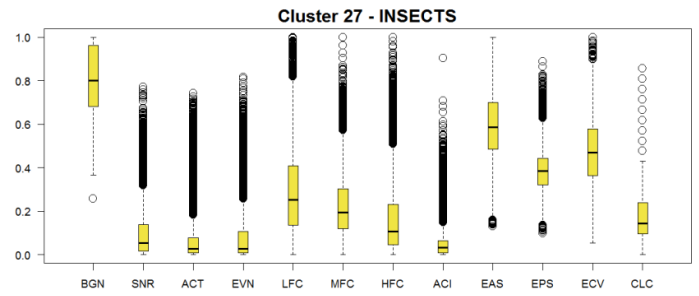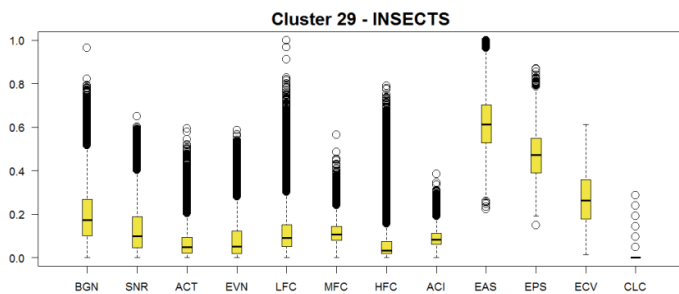

# CICADAS

There is a large variation in index values amongst these cicada clusters, but consistently low ACI values across each. The broadband nature of the cicada calls in this area appear to dominate the mid and/or high frequencies increasing MFC and/or HFC.

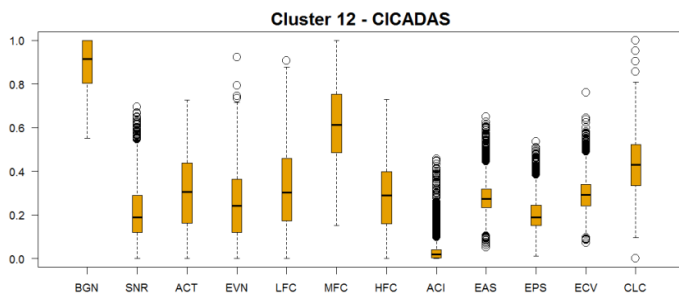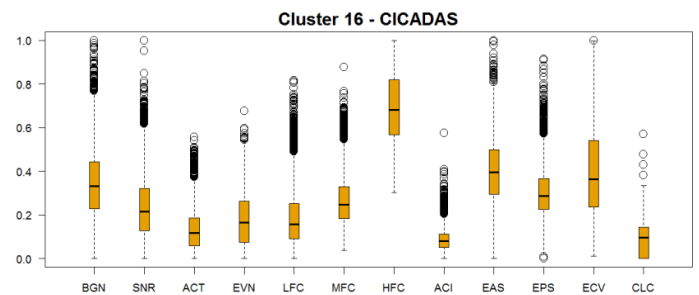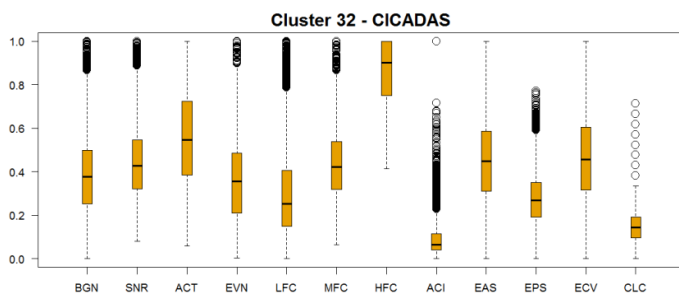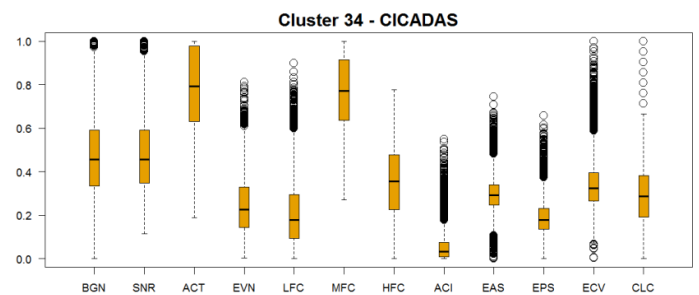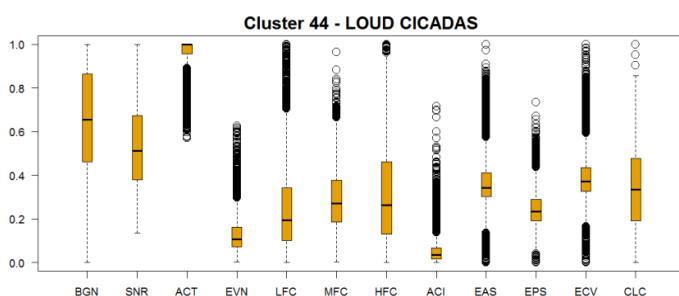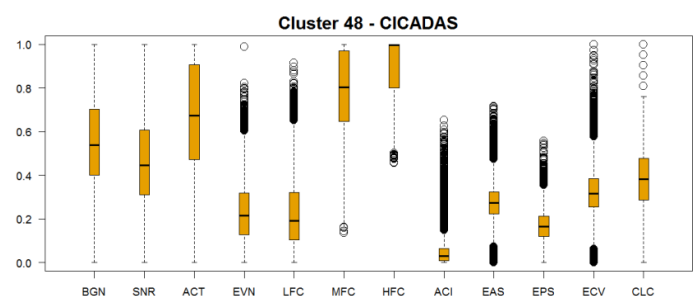

## 2. GEOPHONY

### RAIN

The rain clusters have high to moderate SNR and ACI, due to the percussive nature of the raindrops. The three indices Background Noise (BGN), Events per Second (EVN) and Cluster Count (CLC) appear to increase with rain intensity. The three entropy indices are relatively low indicating a dispersal rather than a concentration of acoustic energy.

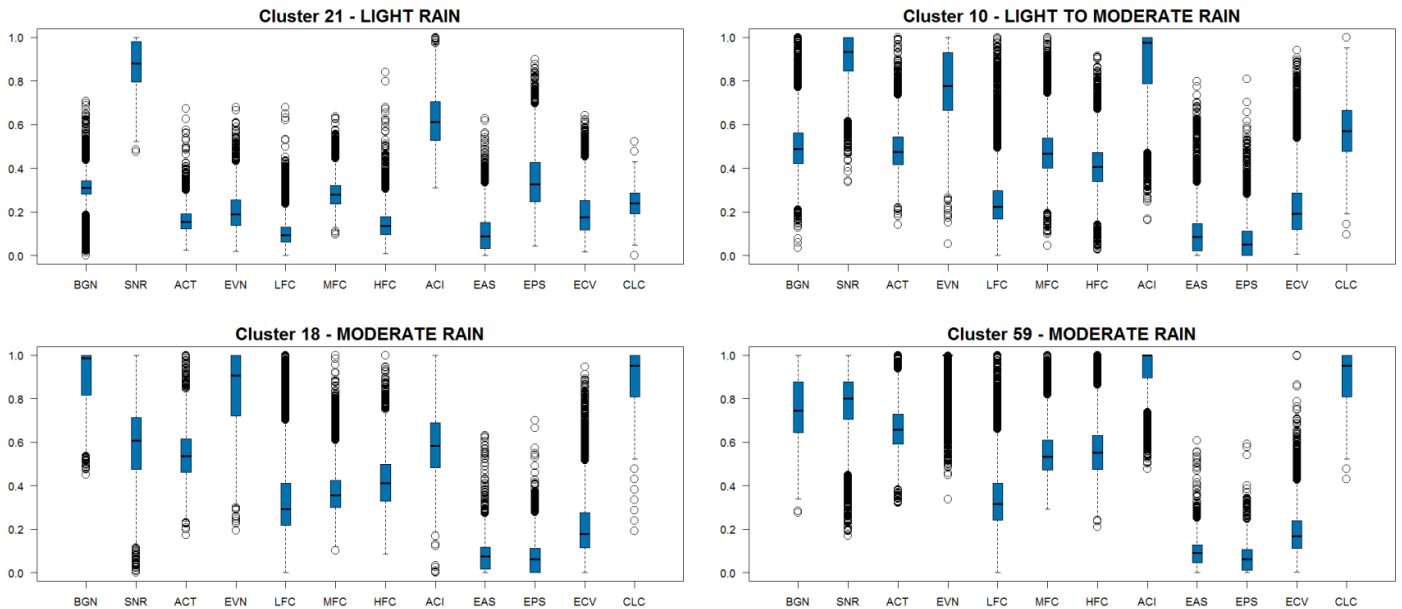

### WIND

The strong wind (clusters 42, 47 and 51) have a very similar pattern of indices across the six indices BGN, ACI, EAS, EPS, ECV and CLC. The three entropy indices and ACI are relatively low. The three Frequency Cover indices (LFC, MFC and HFC) are high for the strong wind clusters (42 and 51) but not so for the very strong wind cluster, cluster 47

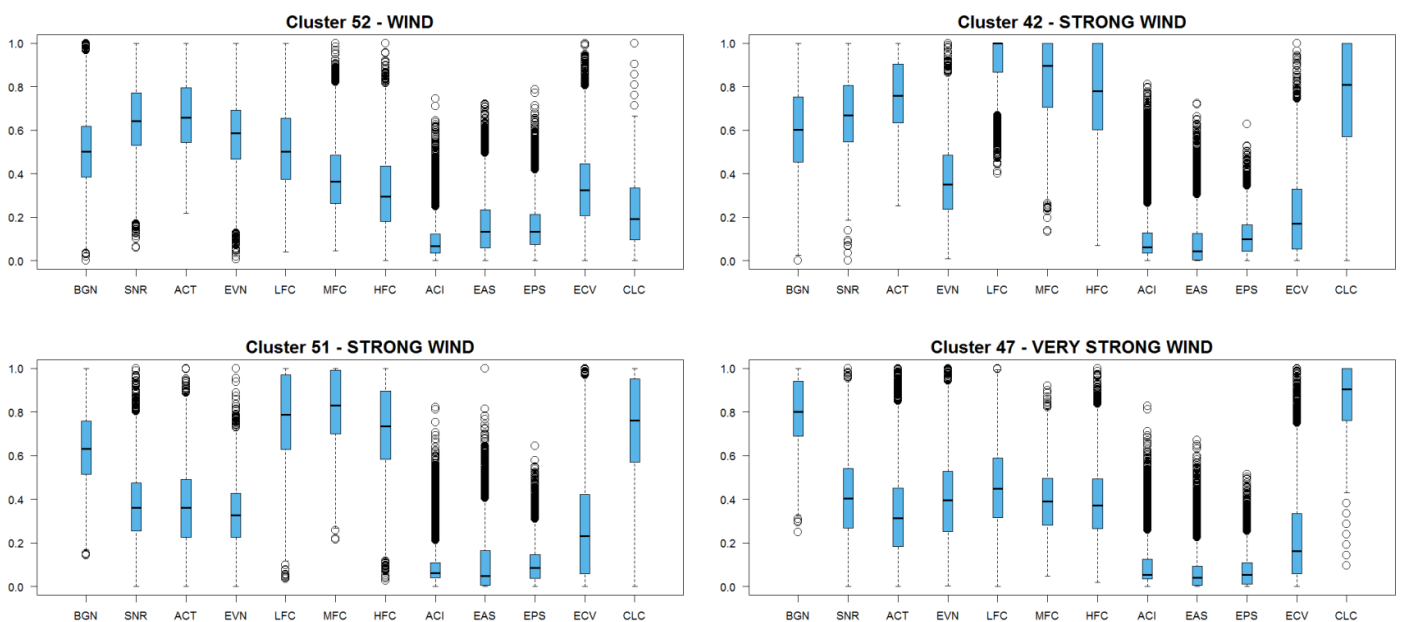



# QUIET

Very low cluster count (CLC), high Entropy of Peaks Spectrum (EPS), low ACI and low mid (MFC) and high frequency cover (HFC).

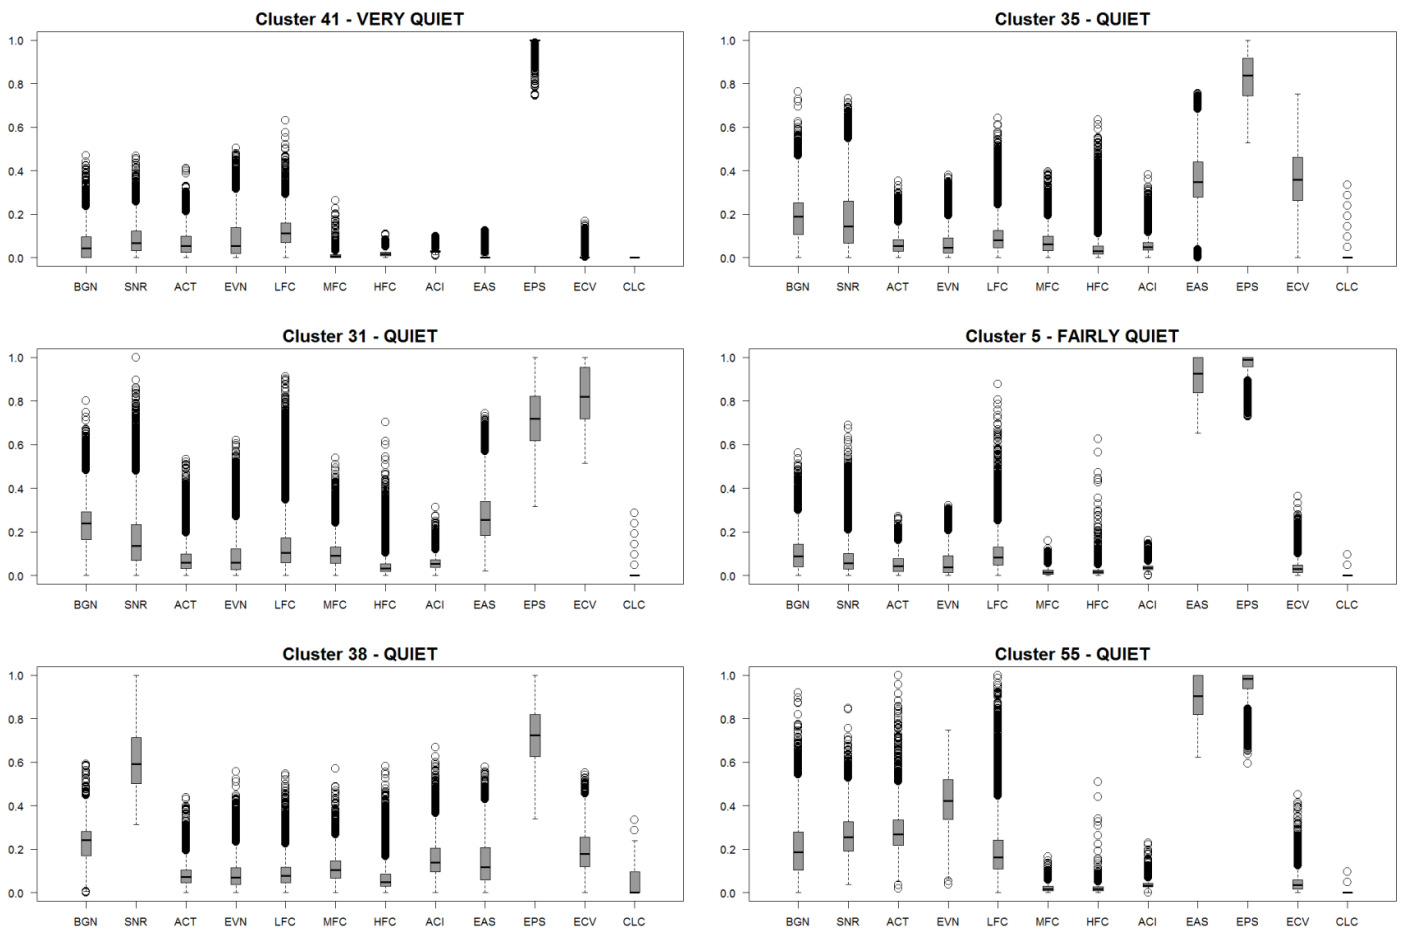

## 3. ANTHROPOPHONY

### PLANES

The plane clusters have high low frequency cover (LFC) and a low cluster count (CLC). The three entropy indices (EAS, EPS and ECV) are moderate indicating a reasonable concentration of acoustic energy. The Acoustic Complexity Index is low because this index has a very low response to flat sounds such as planes [1]

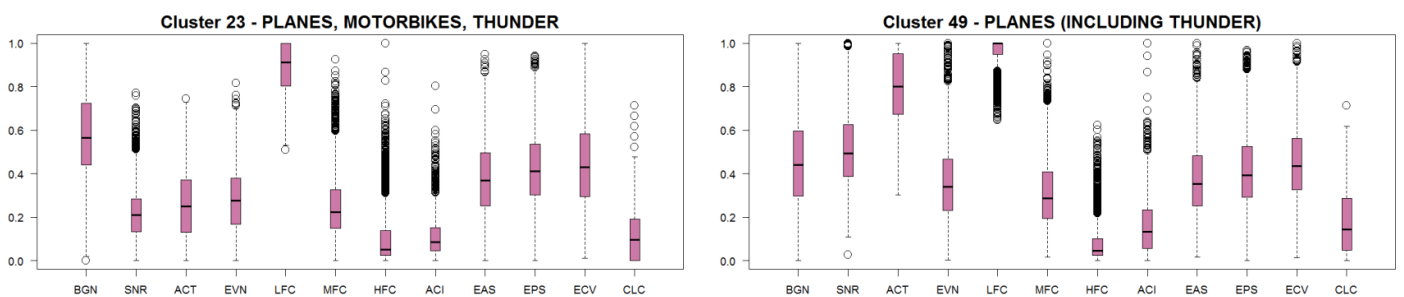

### References

1. Pieretti N, Farina A, Morri D. A new methodology to infer the singing activity of an avian community: the acoustic complexity index (ACI). *Ecological Indicators*. 2011;11(3):868–73.
